1 **Genome-wide analyses supported by RNA-Seq reveal non-canonical splice sites in**  
2 **plant genomes**

3 Boas Pucker<sup>1,2</sup>, Samuel F. Brockington<sup>1</sup>

4 1 Evolution and Diversity, Department of Plant Sciences, University of Cambridge,  
5 Cambridge, United Kingdom

6 2 Genetics and Genomics of Plants, CeBiTec & Faculty of Biology, Bielefeld University,  
7 Bielefeld, Germany

8 \* corresponding author: Boas Pucker, [bpucker@cebitec.uni-bielefeld.de](mailto:bpucker@cebitec.uni-bielefeld.de)

9

10 BP: [bpucker@cebitec.uni-bielefeld.de](mailto:bpucker@cebitec.uni-bielefeld.de)

11 SFB: [sb771@cam.ac.uk](mailto:sb771@cam.ac.uk)

12

13

14 Key words: gene structure, splicing, annotation, comparative genomics, transcriptomics,  
15 gene expression, natural diversity, evolution

16

17

18

19

20

21

22

## 23 **Abstract**

24 Most eukaryotic genes comprise exons and introns thus requiring the precise removal of  
25 introns from pre-mRNAs to enable protein biosynthesis. U2 and U12 spliceosomes catalyze  
26 this step by recognizing motifs on the transcript in order to remove the introns. A process  
27 which is dependent on precise definition of exon-intron borders by splice sites, which are  
28 consequently highly conserved across species. Only very few combinations of terminal  
29 dinucleotides are frequently observed at intron ends, dominated by the canonical GT-AG  
30 splice sites on the DNA level.

31 Here we investigate the occurrence of diverse combinations of dinucleotides at predicted  
32 splice sites. Analyzing 121 plant genome sequences based on their annotation revealed  
33 strong splice site conservation across species, annotation errors, and true biological  
34 divergence from canonical splice sites. The frequency of non-canonical splice sites clearly  
35 correlates with their divergence from canonical ones indicating either an accumulation of  
36 probably neutral mutations, or evolution towards canonical splice sites. Strong conservation  
37 across multiple species and non-random accumulation of substitutions in splice sites indicate  
38 a functional relevance of non-canonical splice sites. The average composition of splice sites  
39 across all investigated species is 98.7% for GT-AG, 1.2% for GC-AG, 0.06% for AT-AC, and  
40 0.09% for minor non-canonical splice sites. RNA-Seq data sets of 35 species were  
41 incorporated to validate non-canonical splice site predictions through gaps in sequencing  
42 reads alignments and to demonstrate the expression of affected genes. We conclude that  
43 *bona fide* non-canonical splice sites are present and appear to be functionally relevant in  
44 most plant genomes, if at low abundance.

45

46

47

48

## 49 Introduction

50 Introns separate eukaryotic genes into exons [1, 2]. After their likely origin as selfish  
51 elements [3], introns subsequently evolved into beneficial components in eukaryotic  
52 genomes [4–6]. Historical debates concerning the evolutionary history of introns led to the  
53 “introns-first-hypothesis” which proposes that introns were already present in the last  
54 common ancestor of all eukaryotes [3, 7]. Although this putative ancestral genome is inferred  
55 to be intron-rich, several plant genomes accumulated more introns during their evolution  
56 generating the highly fragmented gene structures with average intron numbers between six  
57 and seven [8]. Introner elements (IEs) [9], which behave similar to transposable elements,  
58 are one possible mechanism for the amplification of introns [10]. Early introns probably  
59 originated from self-splicing class II introns [3, 11] and evolved into passive elements, that  
60 require removal by eukaryote-specific molecular machineries [11]. No class II introns were  
61 identified in the nuclear genomes of sequenced extant eukaryotes [11] except for  
62 mitochondrial DNA (mtDNA) insertions [12, 13].

63 The removal of these introns during pre-mRNA processing is a complex and expensive step,  
64 which involves 5 snoRNAs and over 150 proteins building the spliceosome [14]. In fact, a  
65 major U2 [15] and a minor U12 spliceosome [16] are removing different intron types from  
66 eukaryotic pre-mRNAs [17]. The major U2 spliceosome mostly recognises canonical GT-AG  
67 introns, but is additionally reported to remove AT-AC class I introns [18]. Non-canonical AT-  
68 AC class II introns are spliced by the minor U2 spliceosome, which is also capable of  
69 removing some GT-AG introns [18, 19]. Highly conserved cis-regulatory sequences are  
70 required for the correct spliceosome recruitment to designated splice sites [20–22]. Although  
71 these sequences pose potential for deleterious mutations [4], some intron positions are  
72 conserved between very distant eukaryotic species like *Homo sapiens* and *Arabidopsis*  
73 *thaliana* [23].

74 Among the most important recognition sequences are dinucleotides at both ends of  
75 spliceosomal introns which show almost no variation from GT at the 5' end and AG at the 3'

76 end, respectively [24]. Different types of alternative splicing generate diversity at the  
77 transcript level by combining exons in different combinations [25]. This process results in a  
78 substantially increased diversity of peptide sequences [2, 26]. Special splicing cases e.g.  
79 utilizing a single nucleotide within an intron for recursive splicing [27] or generating circular  
80 RNAs [28] are called non-canonical splicing events [25] and build an additional layer of RNA  
81 and proteomic diversity. If this process is based on splice sites differing from GT-AG those  
82 splice sites are called non-canonical. Non-canonical splice sites were first identified before  
83 genome sequences became available on a massive scale (reviewed in [29]). GC-AG and AT-  
84 AC are classified as major non-canonical splice site combinations, while all deviations from  
85 these sequences are deemed to be minor non-canonical splice sites. More recently,  
86 advances in sequencing technologies and the development of novel sequence alignment  
87 tools now enable a systematic investigation of non-canonical splicing events [25, 30].  
88 Comprehensive genome sequence assemblies and large RNA-Seq data sets are publicly  
89 available. Dedicated split-read aligners like STAR [31, 32] are able to detect non-canonical  
90 splice sites during the alignment of RNA-Seq reads to genomic sequences. Numerous  
91 differences in annotated non-canonical splice sites even between accessions of the same  
92 species [30] as well as the extremely low frequency of all non-canonical splice sites indicate  
93 that sequencing, assembly, and annotation are potential major sources of erroneously  
94 inferred splice sites [29, 30, 33]. Distinguishing functional splice sites from degraded  
95 sequences such as in pseudogenes is also still an unsolved issue. Nonetheless, the  
96 combined number of currently inferred minor non-canonical splice site combinations is even  
97 higher than the number of the major non-canonical AT-AC splice site combinations [30, 34].  
98 Here, we analysed 121 whole genome sequences from across the entire plant kingdom to  
99 harness the power of a very large sample size and genomic variation accumulated over  
100 extensive periods of evolutionary time, to better understand splice site combinations.  
101 Although, only a small number of splice sites are considered as non-canonical, the potential  
102 number in 121 species is large. Furthermore, conservation of sequences between these  
103 species over a long evolutionary time scale may also serve as a strong indication for their

104 functional relevance. We incorporated RNA-Seq data to differentiate between artifacts and  
105 *bona fide* cases of active non-canonical splice sites. Active splice sites are revealed by an  
106 RNA-Seq read alignment allowing quantification of splice site activity. We then identified  
107 homologous non-canonical splice sites across species and subjected the genes containing  
108 these splice sites to phylogenetic analyses. Conservation over a long evolutionary time,  
109 expression of the effected gene, and RNA-Seq reads spanning the predicted intron served  
110 as evidence to identify *bona fide* functional non-canonical splice site combinations.

111

## 112 **Materials & Methods**

### 113 **Collection of data sets and quality control**

114 Genome sequences (FASTA) and the corresponding annotation (GFF3) of 121 plant species  
115 (Additional file 1) were retrieved from the NCBI. Since all annotations were generated by  
116 GNOMON [35], these data sets should have an equal quality and thus allow comparisons  
117 between them. BUSCO v3 [36] was deployed to assess the completeness and duplication  
118 level of all sets of representative peptide sequences using the reference data set  
119 'embryophyta odb9'.

120

### 121 **Classification of annotated splice sites**

122 Genome sequences and their annotation were processed by a Python script to identify the  
123 representative transcript per gene defined as the transcript that encodes the longest  
124 polypeptide sequence [30, 37]. Like all custom Python scripts relevant for this work, it is  
125 available with additional instructions at <https://github.com/bpucker/ncss2018>. Genes with  
126 putative annotation errors or inconsistencies were filtered out as done before in similar  
127 analyses [38]. Focusing on the longest peptide is essential to avoid biases caused by  
128 different numbers of annotated isoforms in different species. Splice sites within the coding  
129 sequence of the longest transcripts were analyzed by extracting dinucleotides at the borders

130 of all introns. Untranslated regions (UTRs) were avoided due to their more challenging and  
131 thus less reliable prediction [30, 39]. Splice sites and other sequences will be described  
132 based on their encoding DNA sequence (e.g. GT instead of GU for the conserved  
133 dinucleotide at the donor splice site). Based on terminal dinucleotides in introns, splice site  
134 combinations were classified as canonical (GT-AG) or non-canonical if they diverged from  
135 the canonical motif. A more detailed classification into major non-canonical splice site  
136 combinations (GC-AG, AT-AC) and all remaining minor non-canonical splice site  
137 combinations was applied. All following analyses were focused on introns equal or greater  
138 than 20 bp.

139

#### 140 **Investigation of splice site diversity**

141 A Python script was applied to summarize all annotated combinations of splice sites that  
142 were detected in a representative transcript. The specific profile comprising frequency and  
143 diversity of splice site combinations in individual species was analyzed. Splice site  
144 combinations containing ambiguity characters were masked from this analysis as they are  
145 most likely caused by sequencing or annotation errors. Spearman correlation coefficients  
146 were computed pairwise between the splice site profiles of two species to measure their  
147 similarity. Flanking sequences of CA-GG and GC-AG splice sites in rice were investigated,  
148 because CA-GG splice sites seemed to be the result of an erroneous alignment. The  
149 conservation of flanking sequences was illustrated based on sequence web logos  
150 constructed at <https://weblogo.berkeley.edu/logo.cgi>.

151

#### 152 **Analysis of splice site conservation**

153 Selected protein encoding transcript sequences with non-canonical splice sites were  
154 subjected to a search via BLASTn v2.2.28+ [40] to identify homologues in other species to  
155 investigate the conservation of splice sites across plant species. As proof of concept, one

156 previously validated non-canonical splice site containing gene [30], At1g79350 (rna15125),  
157 was investigated in more depth. Homologous transcripts were compared based on their  
158 annotation to investigate the conservation of non-canonical splice sites across species.  
159 Exon-intron structures of selected transcripts were plotted by a Python script using matplotlib  
160 [41] to facilitate manual inspection.

161

## 162 **Validation of annotated splice sites**

163 Publicly available RNA-Seq data sets of different species (Additional file 2) were retrieved  
164 from the Sequence Read Archive [42]. Whenever possible, samples from different tissues  
165 and conditions were included. The selection was restricted to paired-end data sets to provide  
166 a high accuracy during the read mapping. Only species with multiple available data sets were  
167 considered for this analysis. All reads were mapped via STAR v2.5.1b [31] to the  
168 corresponding genome sequence using previously described parameters [43]. A Python  
169 script utilizing BEDTools v2.25.0 [44] was deployed to convert the resulting BAM files into  
170 customized coverage files. Next, the read coverage depth at all exon-intron borders was  
171 calculated based on the terminal nucleotides of an intron and the flanking exons. Splice sites  
172 were considered as supported by RNA-Seq if the read coverage depth dropped by at least  
173 20% when moving from an exon into an intron (Additional file 3).

174

## 175 **Phylogenetic tree construction**

176 RbcL (large RuBisCO subunit) sequences of almost all investigated species were retrieved  
177 from the NCBI for the construction of a phylogenetic tree. MAFFT v.7 [45] was deployed to  
178 generate an alignment which was trimmed to a minimal occupancy of 60% in each alignment  
179 column and finally subjected to FastTree v.2.1.10 [46] for tree construction. Species without  
180 an available RbcL sequence were integrated manually by constructing subtrees based on  
181 scientific names via phyloT (<https://phyloT.biobyte.de/>). Due to these manual adjustments, the

182 branch lengths in the resulting tree are not accurate and only the topology (Additional file 4)  
183 was considered for further analyses.

184

### 185 **Comparison of non-canonical splice sites to overall sequence variation**

186 A previously generated variant data set [47] was used to identify the general pattern of  
187 mutation and variant fixation between the two *A. thaliana* accessions Columbia-0 and  
188 Niederzenz-1. All homozygous SNPs in a given VCF file were considered for the calculation  
189 of nucleotide substitution rates. Corresponding substitution rates were calculated for all minor  
190 non-canonical splice sites by assuming they originated from the closest sequence among  
191 GT-AG, GC-AG, and AT-AC. General substitution rates in a species were compared against  
192 the observed substitution in minor non-canonical splice sites via Chi<sup>2</sup> test.

193

## 194 **Results**

### 195 **Genomic properties of plants and diversity of non-canonical splice sites**

196 Comparison of all genomic data sets revealed an average GC content of 36.3%, an average  
197 percentage of 7.8% of protein encoding sequence, and on average 95.7% of complete  
198 BUSCO genes (Additional file 5). Averaged across all 121 genomes, a genome contains an  
199 average of 27,232 genes with 4.5 introns per gene. The number of introns per gene was only  
200 slightly reduced to 4.15 when only introns enclosed by coding exons were considered for this  
201 analysis.

202 Our investigation of these 121 plant genome sequences revealed a huge variety of different  
203 non-canonical splice site combinations (Additional file 6, Additional file 7). Nevertheless,  
204 most of all annotated introns display the canonical GT-AG dinucleotides at their borders.  
205 Despite the presence of a huge amount of non-canonical splice sites in almost all plant  
206 genomes, the present types and the frequencies of different types show a huge variation



207 between species (Additional file 8). A phylogenetic signal in this data set is weak if it is  
208 present at all. The total number of splice site combinations ranged between 1,505  
209 (*Bathycoccus prasinus*) and 372,164 (*Gossypium arboreum*). Algae displayed a very low  
210 number of non-canonical splice site combinations, but other plant genome annotations within  
211 land plants also did not contain any non-canonical splice sites e.g. *Ziziphus jujuba*.  
212 *Eucalyptus grandis* displayed the highest number of non-canonical splice site combinations  
213 (2,902). There is a strong correlation between the number of non-canonical splice site  
214 combinations and the total number of splice sites (Spearman correlation coefficient=0.53, p-  
215 value= $5.5 \times 10^{-10}$ ). However, there is almost no correlation between the number of splice sites  
216 and the genome size (Additional file 9).

217

### 218 **Non-canonical splice sites are likely to be similar to canonical splice sites**

219 There is a negative correlation between the frequency of non-canonical splice site  
220 combinations and their divergence from canonical sequences ( $r = -0.43$  p-value= $7e-13$ ;  
221 Fig.1;Additional file 7). Splice sites with one difference to a canonical splice site are more  
222 frequent than more diverged splice sites. A similar trend can be observed around the major  
223 non-canonical splice sites AT-AC (Fig.2) and the canonical GT-AG. Comparison of the  
224 overall nucleotide substitution rate in the plant genome and the divergence of minor non-  
225 canonical splice sites from canonical or major non-canonical splice sites revealed significant  
226 differences (p-value=0, Chi<sup>2</sup> test). For example, the substitutions of A by C and A by G were  
227 observed with a similar frequency at splice sites, while the substitution of A by G is almost  
228 three times as likely as the A by C substitution between the *A. thaliana* accessions Col-0 and  
229 Nd-1.

230 The genome-wide distribution of genes with non-canonical splice sites did not reveal striking  
231 patterns. When looking at the chromosome-level genome sequences of *A. thaliana*, *B.*  
232 *vulgaris*, and *V. vinifera* (Additional file 10, Additional file 11, Additional file 12), there were  
233 slightly less genes with non-canonical splice sites close to the centromere. However, the total

234 number of genes was reduced in these regions as well, so likely correlated with genic  
235 content.

236

237 One interesting species-specific property was the high frequency of non-canonical CA-GG  
238 splice site combinations in *Oryza sativa* which is accompanied by a low frequency of the  
239 major non-canonical GC-AG splice sites. In total, 233 CA-GG splice site combinations were  
240 identified. However, the transcript sequences can be aligned in a different way to support  
241 GC-AG sites close to and even overlapping with the annotated CA-GG splice sites. RNA-Seq  
242 reads supported 224 of these CA-GG splice sites. Flanking sequences of CA-GG and GC-  
243 AG splice sites were extracted and aligned to investigate the reason for these erroneous  
244 transcript alignments (Additional file 13). An additional G directly downstream of the 3' AG  
245 splice site was only present when this splice site was predicted as GG. Cases where the GC-  
246 AG was predicted lack this G thus preventing the annotation of a CA-GG splice site  
247 combination.

248

#### 249 **Non-canonical splice sites in single copy genes**

250 To assess the impact of gene copy number on the presence of non-canonical splice sites, we  
251 compared a group of presumably single copy genes against all other genes. The average  
252 percentage of genes with non-canonical splice sites among single copy BUSCO genes was  
253 11.4%. The average percentage among all genes was only 10.4%. This uncorrected  
254 difference between both groups is statistically significant ( $p=0.04$ , Mann-Whitney U test), but  
255 species-specific effects were obvious. While the percentage in some species is almost the  
256 same, other species show a much higher percentage of genes with non-canonical splice  
257 sites among BUSCO genes (Additional file 14). A couple of species displayed an inverted  
258 situation, having less genes with non-canonical splice sites among the BUSCO genes than  
259 the genome-wide average.

260

## 261 **Intron analysis**

262 Length distributions of introns with canonical and non-canonical splice site combinations are  
263 similar in most regions (Fig.3). Most striking differences are the higher abundance of very  
264 short introns with non-canonical splice sites, the lower peak at the most frequent intron  
265 length (around 200 bp), and the high percentage of introns with non-canonical splice sites  
266 that are longer than 5 kb. Although the total number of introns with canonical splice sites  
267 longer than 5 kb is much higher, the proportion of non-canonical splice sites containing  
268 introns is on average at least twice as high as the proportion of introns with canonical splice  
269 site combinations. These differences between both distributions are significant (Wilcoxon  
270 test, p-value=0.02).

271 The likelihood of having a non-canonical splice site in a gene is almost perfectly correlated  
272 with the number of introns (Additional file 15). Analyzing this correlation across all plant  
273 species resulted in a sufficiently large sample size to see this effect even in genes with about  
274 40 introns. Insufficient sample sizes kept us from investigating it for genes with even more  
275 introns.

276

## 277 **Conservation of non-canonical splice sites**

278 Non-canonical splice site combinations detected in *A. thaliana* Col-0 were compared to  
279 single nucleotide polymorphisms of 1,135 accessions which were studied as part of the 1001  
280 genomes project. Of 1,296 non-canonical splice site combinations, 109 overlapped with  
281 listed variant positions. At 21 of those positions, the majority of all accessions displayed the  
282 Col-0 allele, while the remaining 88 positions were dominated by other alleles.

283 To differentiate between randomly occurring non-canonical splice sites (e.g. sequencing  
284 errors) and true biological variation, the conservation of non-canonical splice sites across  
285 multiple species can be analyzed. This approach was demonstrated for the selected

286 candidate At1g79350 (rna15125). Manual inspection revealed that non-canonical splice sites  
287 were conserved in three positions in many putative homologous genes across various  
288 species (Additional file 16).

289

### 290 **RNA-Seq-based validation of annotated splice sites**

291 RNA-Seq reads of 35 different species (Additional file 2) were mapped to the respective  
292 genome sequence to allow the validation of splice sites based on changes in the read  
293 coverage depth (Additional file 3, Additional file 17). Validation ratios of all splice sites ranged  
294 from 75.5% in *Medicago truncatula* to 96.4% in *Musa acuminata*. A moderate correlation  
295 ( $r=0.46$ ) between the amount of RNA-Seq reads and the ratio of validated splice sites was  
296 observed (Additional file 18). When only considering non-canonical splice sites, the validation  
297 ranged from 15.2% to 91.3% displaying a similar correlation with the amount of sequencing  
298 reads. Based on validated splice sites, the proportion of different splice site combinations  
299 was analyzed across all species (Fig.4). The average percentages are approximately 98.7%  
300 for GT-AG, 1.2% for GC-AG, 0.06% for AT-AC, and 0.09% for all other minor splice site  
301 combinations. *Medicago truncatula*, *Oryza sativa*, *Populus trichocarpa*, *Monoraphidium*  
302 *neglectum*, and *Morus notabilis* displayed substantially lower validation values for the major  
303 non-canonical splice sites.

304

### 305 **Quantification of splice site usage**

306 Based on mapped RNA-Seq reads, the usage of different splice sites was quantified (Fig.5;  
307 doi:10.4119/unibi/2931315). Canonical GT-AG splice site combinations displayed the  
308 strongest RNA-Seq read coverage drop when moving from an exon into an intron (Additional  
309 file 3). There was a substantial difference in average splice site usage between 5' and the 3'  
310 ends of GT-AG introns. The same trend holds true for major non-canonical GC-AG splice site  
311 combinations, while the total splice site usage is lower. Major non-canonical AT-AC and

312 minor non-canonical splice sites did not show a difference between 5' and 3' end. However,  
313 the total usage values of AT-AC are even lower than the values of GC-AG splice sites.

314 There is a significant correlation between the usage of a 5' splice site and the corresponding  
315 3' splice site. However, the Spearman correlation coefficient varies between all four groups  
316 of splice sites ranging from 0.42 in minor non-canonical splice site combinations to 0.82 in  
317 major non-canonical AT-AC splice site combinations.

318

319

## 320 **Discussion**

321 This inspection of non-canonical splice sites annotated in plant genome sequences was  
322 performed to capture the diversity and to assess the validity of these annotations, because  
323 previous studies indicate that annotations of non-canonical splice sites are a mixture of  
324 artifacts and *bona fide* splice sites [29, 34, 48]. Our results update and expand previous  
325 systematic analyses of non-canonical splice sites in smaller data sets [29, 30, 33, 34]. An  
326 extended knowledge about non-canonical splice sites in plants could benefit gene predictions  
327 [30, 49], as novel genome sequences are often annotated by lifting an existing annotation.

328

### 329 **Confirmation of *bona fide* splicing from minor non-canonical combinations**

330 Our analyses supported a variety of different non-canonical splice sites matching previous  
331 reports of *bona fide* non-canonical splice sites [29, 30, 34, 48]. Frequencies of different minor  
332 non-canonical splice site combinations are not random and vary between different  
333 combinations. Those combinations similar to the canonical combination or the major non-  
334 canonical splice site combinations are more frequent. Furthermore, our RNA-Seq analyses  
335 demonstrate the actual use of non-canonical splice sites, revealing a huge variety of different  
336 transcripts derived from non-canonical splice sites, which may be evolutionarily significant.

337 Although, some non-canonical splice sites may be located in pseudogenes, the  
338 transcriptional activity and accurate splicing at most non-canonical splice sites indicates  
339 functional relevance e.g. by contributing to functional diversity as previously postulated [2,  
340 25, 26]. These findings are consistent with published reports that have demonstrated  
341 functional RNAs generated from non-canonical splice sites [30, 50].

342 In general, the pattern of non-canonical splice sites is very similar between species with  
343 major non-canonical splice sites accounting for most cases of non-canonical splicing. While  
344 the average across plants of 98.7% GT-AG canonical splice sites is in agreement with recent  
345 reports for *A. thaliana* [30], it is slightly lower than 99.2 % predicted for mammals [33] or  
346 99.3% as previously reported for Arabidopsis based on cDNAs [51]. In contrast, the  
347 frequency of major non-canonical GC-AG splice sites in plants is almost twice the value  
348 reported for mammals [33]. Most importantly the proportion of 0.09% minor non-canonical  
349 splice site combinations in plants is substantially higher than the estimation of 0.02% initially  
350 reported for mammals [33]. Taking these findings together, both major and minor non-  
351 canonical splice sites could be a more significant phenomenon of splicing in plants than in  
352 animals. This hypothesis would be consistent with the notion that splicing in plants is a more  
353 complex and diverse process than that occurring in metazoan lineages [52–54]. An in-depth  
354 investigation of non-canonical splice sites in animals and fungi would be needed to validate  
355 this hypothesis.

356

### 357 **Species-specific differences in minor non-canonical splice site combinations**

358 As previous studies on non-canonical splice sites were often focused on one species [51] or  
359 a few model organisms [33, 34, 38], the observed variation among the plant genomes  
360 investigated here updates the current knowledge and revealed potential species-specific  
361 differences. The group of minor non-canonical splice sites displayed the largest variation  
362 between species, and a frequent non-canonical splice site combination (CA-GG) which  
363 appeared peculiar to *O. sativa* is probably due to an alignment error. In other words, the

364 predicted CA-GG splice site combinations in rice can be conceived as major non-canonical  
365 GC-AG events by just splitting the transcript sequence in a different way during the alignment  
366 over the intron. An additional downstream G at the 3' splice site seems to be responsible for  
367 leading to this annotation, because cases where GC-AG was correctly annotated do not  
368 display this G in the respective position. Dedicated alignment tools are needed to  
369 bioinformatically distinguish these events [55], otherwise manual inspection must be used to  
370 correctly resolve these situations.

371 Despite all artifacts described here and elsewhere [29, 33, 56], non-canonical splice sites  
372 seem to have conserved functions as indicated by conservation over long evolutionary  
373 periods displayed as presence in homologous sequences in multiple species [23, 29]. Our  
374 own analyses across multiple accessions of *A. thaliana* support this conjecture and suggest  
375 that some non-canonical splice sites are conserved in homologous loci at the intra-specific  
376 level. At the same time, there is intra-specific variability [30] that might be attributed to the  
377 accumulation of mutations prior to purifying selection. Assessing the variability within a  
378 species could be an additional approach to distinguish *bona fide* splice sites from artifacts or  
379 recent mutations.

380

### 381 **Putative mechanisms for processing of minor non-canonical splice sites**

382 We sought to understand possible correlations with minor non-canonical splice site  
383 combinations in order understand the mechanisms driving their occurrence. Therefore, we  
384 explored the impact of genomic position relative to centromeres, the effect of increased gene  
385 number, and the impact of intron length. The occurrence of non-canonical splice sites is  
386 reduced with proximity to the centromere, but this is likely due to reduced gene content in  
387 centromeric regions. Averaged across all species, there a significantly higher proportion of  
388 non-canonical sites in single copy genes, but species-specific differences also violate this  
389 observation, suggesting that gene copy number is not an important determinant. However,  
390 non-canonical splice sites may be more important in splicing very long introns, because they

391 appear in introns above 5 kb with a higher relative likelihood than canonical splice sites.  
392 Previous studies postulated different non-spliceosomal removal mechanisms for such introns  
393 including the IRE1 / tRNA ligase system [57, 58] and short direct repeats leading to  
394 transcriptional slippage [59, 60]. It should be mentioned that many sequence variants of  
395 snRNAs are encoded in plant genomes [61]. The presence of multiple spliceosome types in  
396 addition to the canonical U2 and the non-canonical U12 spliceosome could be another  
397 explanation [38].

398 Another hypothesis suggests parasitic splice sites using neighbouring recognition sites for  
399 the splicing machinery to enable their processing [33]. The mere presence of GT close to the  
400 5' non-canonical splice site and AG close to the 3' non-canonical splice site might be  
401 sufficient for this process to take place. These non-canonical splice sites are expected to be  
402 in frame with the associated GT-AG signals which could be responsible for recruiting the  
403 splicing machinery [33]. This hypothesis is supported by the observation that splice sites  
404 seem to be missed sometimes thus leading to the use of the next splice site which is usually  
405 in frame with the original one [51]. Further investigation might connect neighbouring  
406 sequences to the processing of minor non-canonical splice sites.

407 There is no evidence for RNA editing to modify splice sites yet, but previous studies found  
408 that modifications of mRNAs are necessary to enable proper splicing in some cases [62].  
409 Even so such a system is probably not in place for all minor non-canonical splice sites, a  
410 modification of nucleotides in the transcript would be another way to regulate gene  
411 expression at the post-transcriptional level.

412 Although, these hypotheses could be an additional or alternative explanations for the  
413 situation observed in *O. sativa*, considering the CA-GG cases as annotation and alignment  
414 errors seems more likely due to their unique presence in this species.

415

416 **Usage of non-canonical splice sites**



417 Our results could provide a strong foundation to further analyses of the splicing process by  
418 providing detailed information about the frequency at which splicing occurred at a certain  
419 splice site. The results indicate that this usage of different splice site types could vary  
420 substantially. A possible explanation for these observed differences is the mixture of RNA-  
421 Seq data sets, which contains samples from various tissues and different environmental or  
422 physiological conditions. Sequencing reads reflect the splicing events occurring under these  
423 specific conditions. As previously indicated by several reports, non-canonical splice sites  
424 might be more frequently used under stress conditions [25, 48, 60].

425 The observation of a stronger usage of the donor splice site over the acceptor splice site in  
426 GT-AG and GC-AG splice site combinations is matching previous reports where one donor  
427 splice site can be associated with multiple acceptor splice sites [51, 63]. The absence of this  
428 effect at minor non-canonical splice site combinations might hint towards a different splicing  
429 mechanism, which is restricted to precisely one combination of donor and acceptor splice  
430 site.

431

### 432 **Limitations of the current analyses**

433 Some constraints limit the power of the presented analyses. In accordance with the important  
434 plant database Araport11 [37] and previous analyses [30], only the transcript encoding the  
435 longest peptide sequence was considered when investigating splice site conservation across  
436 species. Although the exclusion of alternative transcripts was necessary to compensate  
437 differences in the annotation quality, more non-canonical splice sites could be revealed by  
438 investigations of all transcript versions in the future. The exclusion of annotated introns  
439 shorter than 20 bp as well as the minimal intron length cutoff of 20 bp during the RNA-Seq  
440 read mapping prevented the investigation of very small introns. This cutoff was selected to  
441 avoid previously reported issues with false positives [48]. However, *de novo* identification of  
442 very short introns as recently performed for *Mus musculus* and *H. sapiens* [48, 64] could  
443 become feasible as RNA-Seq data sets based on similar protocols become available for a

444 broad range of plant species. Variations between RNA-Seq samples posed another  
445 challenge. Since there is a substantial amount of variation within species [65, 66], we can  
446 assume that small differences in the genetic background of the analyzed material could bias  
447 the results. Splice sites of interest might be canonical splice site combinations in some  
448 accessions or subspecies, respectively, while they are non-canonical in others. Despite our  
449 attempts to collect RNA-Seq samples derived from a broad range of different conditions and  
450 tissues for each species, data of many specific physiological states are missing for most  
451 species. Therefore, we cannot exclude that certain non-canonical splice sites were missed in  
452 our splice site usage analysis due to a lack of gene expression under the investigated  
453 conditions.

454

#### 455 **Future Perspectives**

456 As costs for RNA-Seq data generation drops over the years [67], improved analyses will  
457 become possible over time. Investigation of homologous non-canonical splice sites poses  
458 several difficulties, as the exonic sequence is not necessarily conserved. Due to upstream  
459 changes in the exon-intron structure [68], the number of the non-canonical intron can differ  
460 between species. However, a computationally feasible approach to investigate the phylogeny  
461 of all non-canonical splice sites would significantly enhance our knowledge e.g. about the  
462 emergence and loss of non-canonical splice sites. Experimental validation of splice sites *in*  
463 *vivo* and *in vitro* could be the next step. It is crucial for such analyses to avoid biases  
464 introduced by reverse transcription artifacts e.g. by comparing different enzymes and  
465 avoiding random hexameters during cDNA synthesis [69]. Splice sites could be  
466 experimentally validated e.g. by integration in the *Aequoria vicotria* GFP sequence [70] to  
467 see if they are functional in plants. Our analyses support the concept that differences  
468 between plant species need to be taken into account when performing such investigations  
469 [71, 72].

470

471 **Declarations**

472 **Ethics approval and consent to participate**

473 Not applicable

474 **Consent for publication**

475 Not applicable

476 **Availability of data and materials**

477 The datasets generated during the current study are included as Additional files and publicly  
478 available from doi:10.4119/unibi/2931315. Scripts written for the described analyses are  
479 available on github: <https://github.com/bpucker/ncss2018>.

480 **Competing interests**

481 The authors declare that they have no competing interests.

482 **Funding**

483 We acknowledge support for the Article Processing Charge by the Deutsche  
484 Forschungsgemeinschaft and the Open Access Publication Fund of Bielefeld University.

485 **Authors' contribution**

486 BP and SFB designed the research. BP performed bioinformatic analyses. BP and SFB  
487 interpreted the results and wrote the manuscript.

488 **Acknowledgements**

489 We are thankful to everyone involved in generating the datasets underlying this study.

490

491 **References**

- 492 1. Berget SM, Moore C, Sharp PA. Spliced segments at the 5' terminus of adenovirus 2 late mRNA.  
493 Proc Natl Acad Sci U S A. 1977;74:3171–5.
- 494 2. Gilbert W. The Exon Theory of Genes. Cold Spring Harb Symp Quant Biol. 1987;52:901–5.
- 495 3. Koonin EV, Senkevich TG, Dolja VV. The ancient Virus World and evolution of cells. Biol Direct.  
496 2006;1:29.
- 497 4. Carmel L, Chorev M. The Function of Introns. Front Genet. 2012;3. doi:10.3389/fgene.2012.00055.
- 498 5. Jo B-S, Choi SS. Introns: The Functional Benefits of Introns in Genomes. Genomics Inform.  
499 2015;13:112–8.
- 500 6. Mukherjee D, Saha D, Acharya D, Mukherjee A, Chakraborty S, Ghosh TC. The role of introns in the  
501 conservation of the metabolic genes of Arabidopsis thaliana. Genomics. 2018;110:310–7.
- 502 7. Rogozin IB, Carmel L, Csuros M, Koonin EV. Origin and evolution of spliceosomal introns. Biol  
503 Direct. 2012;7:11.
- 504 8. Csuros M, Rogozin IB, Koonin EV. A Detailed History of Intron-rich Eukaryotic Ancestors Inferred  
505 from a Global Survey of 100 Complete Genomes. PLoS Comput Biol. 2011;7.  
506 doi:10.1371/journal.pcbi.1002150.
- 507 9. Worden AZ, Lee J-H, Mock T, Rouzé P, Simmons MP, Aerts AL, et al. Green evolution and dynamic  
508 adaptations revealed by genomes of the marine picoeukaryotes Micromonas. Science.  
509 2009;324:268–72.
- 510 10. Huff JT, Zilberman D, Roy SW. Mechanism for DNA transposons to generate introns on genomic  
511 scales. Nature. 2016;538:533–6.
- 512 11. Zimmerly S, Semper C. Evolution of group II introns. Mob DNA. 2015;6. doi:10.1186/s13100-015-  
513 0037-5.
- 514 12. Knoop V, Brennicke A. Promiscuous mitochondrial group II intron sequences in plant nuclear  
515 genomes. J Mol Evol. 1994;39:144–50.
- 516 13. Pucker B, Holtgraewe D, Stadermann KB, Frey K, Huettel B, Reinhardt R, et al. A Chromosome-  
517 level Sequence Assembly Reveals the Structure of the Arabidopsis thaliana Nd-1 Genome and its  
518 Gene Set. bioRxiv. 2018;;407627.
- 519 14. Wahl MC, Will CL, Lührmann R. The Spliceosome: Design Principles of a Dynamic RNP Machine.  
520 Cell. 2009;136:701–18.
- 521 15. Papasaiakas P, Valcárcel J. The Spliceosome: The Ultimate RNA Chaperone and Sculptor. Trends  
522 Biochem Sci. 2016;41:33–45.
- 523 16. Turunen JJ, Niemelä EH, Verma B, Frilander MJ. The significant other: splicing by the minor  
524 spliceosome. Wiley Interdiscip Rev RNA. 2013;4:61–76.
- 525 17. Hall SL, Padgett RA. Conserved Sequences in a Class of Rare Eukaryotic Nuclear Introns with Non-  
526 consensus Splice Sites. J Mol Biol. 1994;239:357–65.
- 527 18. Wu Q, Krainer AR. Splicing of a divergent subclass of AT-AC introns requires the major  
528 spliceosomal snRNAs. RNA. 1997;3:586–601.

- 529 19. Dietrich RC, Inorvaia R, Padgett RA. Terminal intron dinucleotide sequences do not distinguish  
530 between U2- and U12-dependent introns. *Mol Cell*. 1997;1:151–60.
- 531 20. Lewandowska D, Simpson CG, Clark GP, Jennings NS, Barciszewska-Pacak M, Lin C-F, et al.  
532 Determinants of Plant U12-Dependent Intron Splicing Efficiency. *Plant Cell*. 2004;16:1340–52.
- 533 21. Wang G-S, Cooper TA. Splicing in disease: disruption of the splicing code and the decoding  
534 machinery. *Nat Rev Genet*. 2007;8:749–61.
- 535 22. Will CL, Lührmann R. Spliceosome Structure and Function. *Cold Spring Harb Perspect Biol*.  
536 2011;3:a003707.
- 537 23. Rogozin IB, Wolf YI, Sorokin AV, Mirkin BG, Koonin EV. Remarkable Interkingdom Conservation of  
538 Intron Positions and Massive, Lineage-Specific Intron Loss and Gain in Eukaryotic Evolution. *Curr Biol*.  
539 2003;13:1512–7.
- 540 24. Jacob M, Gallinaro H. The 5' splice site: phylogenetic evolution and variable geometry of  
541 association with U1RNA. *Nucleic Acids Res*. 1989;17:2159–80.
- 542 25. Sibley CR, Blazquez L, Ule J. Lessons from non-canonical splicing. *Nat Rev Genet*. 2016;17:407–21.
- 543 26. Gorlova O, Fedorov A, Logothetis C, Amos C, Gorlov I. Genes with a large intronic burden show  
544 greater evolutionary conservation on the protein level. *BMC Evol Biol*. 2014;14:50.
- 545 27. Sibley CR, Emmett W, Blazquez L, Faro A, Haberman N, Briese M, et al. Recursive splicing in long  
546 vertebrate genes. *Nature*. 2015;521:371–5.
- 547 28. Zhao W, Cheng Y, Zhang C, You Q, Shen X, Guo W, et al. Genome-wide identification and  
548 characterization of circular RNAs by high throughput sequencing in soybean. *Sci Rep*. 2017;7:5636.
- 549 29. Jackson JJ. A reappraisal of non-consensus mRNA splice sites. *Nucleic Acids Res*. 1991;19:3795–8.
- 550 30. Pucker B, Holtgräwe D, Weisshaar B. Consideration of non-canonical splice sites improves gene  
551 prediction on the Arabidopsis thaliana Niederzenz-1 genome sequence. *BMC Res Notes*. 2017;10.  
552 doi:10.1186/s13104-017-2985-y.
- 553 31. Dobin A, Davis CA, Schlesinger F, Drenkow J, Zaleski C, Jha S, et al. STAR: ultrafast universal RNA-  
554 seq aligner. *Bioinformatics*. 2013;29:15–21.
- 555 32. Dobin A, Gingeras TR. Mapping RNA-seq Reads with STAR. *Curr Protoc Bioinforma*.  
556 2015;51:11.14.1-11.14.19.
- 557 33. Burset M, Seledtsov IA, Solovyev VV. Analysis of canonical and non-canonical splice sites in  
558 mammalian genomes. *Nucleic Acids Res*. 2000;28:4364–75.
- 559 34. Sheth N, Roca X, Hastings ML, Roeder T, Krainer AR, Sachidanandam R. Comprehensive splice-site  
560 analysis using comparative genomics. *Nucleic Acids Res*. 2006;34:3955–67.
- 561 35. Souvorov A, Kapustin Y, Kiryutin B, Chetvernin V, Tatusova T, Lipman D. Gnomon – NCBI  
562 eukaryotic gene prediction tool. 2010.  
563 <http://www.ncbi.nlm.nih.gov/core/assets/genome/files/Gnomon-description.pdf>. Accessed 25 Sep  
564 2018.

- 565 36. Simão FA, Waterhouse RM, Ioannidis P, Kriventseva EV, Zdobnov EM. BUSCO: assessing genome  
566 assembly and annotation completeness with single-copy orthologs. *Bioinformatics*. 2015;31:3210–2.
- 567 37. Cheng C-Y, Krishnakumar V, Chan AP, Thibaud-Nissen F, Schobel S, Town CD. Araport11: a  
568 complete reannotation of the *Arabidopsis thaliana* reference genome. *Plant J*. 2017;89:789–804.
- 569 38. Qu W, Cingolani P, Zeeberg BR, Ruden DM. A Bioinformatics-Based Alternative mRNA Splicing  
570 Code that May Explain Some Disease Mutations Is Conserved in Animals. *Front Genet*. 2017;8.  
571 doi:10.3389/fgene.2017.00038.
- 572 39. Hoff KJ, Stanke M. WebAUGUSTUS—a web service for training AUGUSTUS and predicting genes in  
573 eukaryotes. *Nucleic Acids Res*. 2013;41:W123–8.
- 574 40. Altschul SF, Gish W, Miller W, Myers EW, Lipman DJ. Basic local alignment search tool. *J Mol Biol*.  
575 1990;215:403–10.
- 576 41. Hunter JD. Matplotlib: A 2D Graphics Environment. *Comput Sci Eng*. 2007;9:90–5.
- 577 42. Leinonen R, Sugawara H, Shumway M. The Sequence Read Archive. *Nucleic Acids Res*. 2011;39  
578 suppl\_1:D19–21.
- 579 43. Haak M, Vinke S, Keller W, Droste J, Rückert C, Kalinowski J, et al. High Quality de Novo  
580 Transcriptome Assembly of *Croton tiglium*. *Front Mol Biosci*. 2018;5. doi:10.3389/fmolb.2018.00062.
- 581 44. Quinlan AR, Hall IM. BEDTools: a flexible suite of utilities for comparing genomic features.  
582 *Bioinformatics*. 2010;26:841–2.
- 583 45. Katoh K, Standley DM. MAFFT Multiple Sequence Alignment Software Version 7: Improvements in  
584 Performance and Usability. *Mol Biol Evol*. 2013;30:772–80.
- 585 46. Price MN, Dehal PS, Arkin AP. FastTree 2 – Approximately Maximum-Likelihood Trees for Large  
586 Alignments. *PLoS ONE*. 2010;5. doi:10.1371/journal.pone.0009490.
- 587 47. Pucker B, Holtgräwe D, Rosleff Sörensen T, Stracke R, Viehöver P, Weisshaar B. A De Novo  
588 Genome Sequence Assembly of the *Arabidopsis thaliana* Accession Niederzenz-1 Displays  
589 Presence/Absence Variation and Strong Synteny. *PLOS ONE*. 2016;11:e0164321.
- 590 48. Abebrese EL, Ali SH, Arnold ZR, Andrews VM, Armstrong K, Burns L, et al. Identification of human  
591 short introns. *PLOS ONE*. 2017;12:e0175393.
- 592 49. Sparks ME, Brendel V. Incorporation of splice site probability models for non-canonical introns  
593 improves gene structure prediction in plants. *Bioinformatics*. 2005;21 Suppl\_3:iii20–iii30.
- 594 50. Gupta S, Wang B-B, Stryker GA, Zanetti ME, Lal SK. Two novel arginine/serine (SR) proteins in  
595 maize are differentially spliced and utilize non-canonical splice sites. *Biochim Biophys Acta*.  
596 2005;1728:105–14.
- 597 51. Alexandrov NN, Troukhan ME, Brover VV, Tatarinova T, Flavell RB, Feldmann KA. Features of  
598 *Arabidopsis* Genes and Genome Discovered using Full-length cDNAs. *Plant Mol Biol*. 2006;60:69–85.
- 599 52. Ner-Gaon H, Leviatan N, Rubin E, Fluhr R. Comparative Cross-Species Alternative Splicing in  
600 Plants. *Plant Physiol*. 2007;144:1632–41.

- 601 53. Richardson DN, Rogers MF, Labadorf A, Ben-Hur A, Guo H, Paterson AH, et al. Comparative  
602 Analysis of Serine/Arginine-Rich Proteins across 27 Eukaryotes: Insights into Sub-Family Classification  
603 and Extent of Alternative Splicing. *PLOS ONE*. 2011;6:e24542.
- 604 54. Ling Y, Alshareef S, Butt H, Lozano-Juste J, Li L, Galal AA, et al. Pre-mRNA splicing repression  
605 triggers abiotic stress signaling in plants. *Plant J*. 2017;89:291–309.
- 606 55. Slater GS, Birney E. Automated generation of heuristics for biological sequence comparison. *BMC*  
607 *Bioinformatics*. 2005;6:31–31.
- 608 56. Parada GE, Munita R, Cerda CA, Gysling K. A comprehensive survey of non-canonical splice sites in  
609 the human transcriptome. *Nucleic Acids Res*. 2014;42:10564–78.
- 610 57. Sidrauski C, Cox JS, Walter P. tRNA Ligase Is Required for Regulated mRNA Splicing in the  
611 Unfolded Protein Response. *Cell*. 1996;87:405–13.
- 612 58. Gonzalez TN, Sidrauski C, Dörfler S, Walter P. Mechanism of non-spliceosomal mRNA splicing in  
613 the unfolded protein response pathway. *EMBO J*. 1999;18:3119–32.
- 614 59. Ritz K, van Schaik BDC, Jakobs ME, Aronica E, Tijssen MA, van Kampen AHC, et al. Looking ultra  
615 deep: Short identical sequences and transcriptional slippage. *Genomics*. 2011;98:90–5.
- 616 60. Dubrovina AS, Kiselev KV, Zhuravlev YN. The Role of Canonical and Noncanonical Pre-mRNA  
617 Splicing in Plant Stress Responses. *BioMed Res Int*. 2013;2013. doi:10.1155/2013/264314.
- 618 61. Solymosy F, Pollák T. Uridylate-Rich Small Nuclear RNAs (UsnRNAs), Their Genes and  
619 Pseudogenes, and UsnRNPs in Plants: Structure and Function. A Comparative Approach. *Crit Rev*  
620 *Plant Sci*. 1993;12:275–369.
- 621 62. Castandet B, Choury D, Bégu D, Jordana X, Araya A. Intron RNA editing is essential for splicing in  
622 plant mitochondria. *Nucleic Acids Res*. 2010;38:7112–21.
- 623 63. Mühlemann O, Kreivi JP, Akusjärvi G. Enhanced splicing of nonconsensus 3' splice sites late during  
624 adenovirus infection. *J Virol*. 1995;69:7324–7.
- 625 64. Bai Y, Ji S, Wang Y. IRcall and IRclassifier: two methods for flexible detection of intron retention  
626 events from RNA-Seq data. *BMC Genomics*. 2015;16:S9.
- 627 65. Clark RM, Schweikert G, Toomajian C, Ossowski S, Zeller G, Shinn P, et al. Common Sequence  
628 Polymorphisms Shaping Genetic Diversity in *Arabidopsis thaliana*. *Science*. 2007;317:338–42.
- 629 66. Alonso-Blanco C, Andrade J, Becker C, Bemm F, Bergelson J, Borgwardt KM, et al. 1,135 Genomes  
630 Reveal the Global Pattern of Polymorphism in *Arabidopsis thaliana*. *Cell*. 2016;166:481–91.
- 631 67. Muir P, Li S, Lou S, Wang D, Spakowicz DJ, Salichos L, et al. The real cost of sequencing: scaling  
632 computation to keep pace with data generation. *Genome Biol*. 2016;17:53.
- 633 68. Garcia-España A, Mares R, Sun T-T, DeSalle R. Intron Evolution: Testing Hypotheses of Intron  
634 Evolution Using the Phylogenomics of Tetraspanins. *PLoS ONE*. 2009;4.  
635 doi:10.1371/journal.pone.0004680.
- 636 69. Houseley J, Tollervey D. Apparent Non-Canonical Trans-Splicing Is Generated by Reverse  
637 Transcriptase In Vitro. *PLoS ONE*. 2010;5. doi:10.1371/journal.pone.0012271.

638 70. Haseloff J, Siemering KR, Prasher DC, Hodge S. Removal of a cryptic intron and subcellular  
639 localization of green fluorescent protein are required to mark transgenic Arabidopsis plants brightly.  
640 Proc Natl Acad Sci U S A. 1997;94:2122–7.

641 71. Keith B, Chua N-H. Monocot and dicot pre-mRNAs are processed with different efficiencies in  
642 transgenic tobacco. EMBO J. 1986;5:2419–25.

643 72. Goodall GJ, Filipowicz W. Different effects of intron nucleotide composition and secondary  
644 structure on pre-mRNA splicing in monocot and dicot plants. EMBO J. 1991;10:2635–44.

645

646

#### 647 **Additional files**

648 **Additional file 1. Analysed data sets.** List of investigated genome sequences and  
649 corresponding annotation. Md5sums are given for all files.

650 **Additional file 2. RNA-Seq data sets.** List of Sequence Read Archive accession numbers  
651 of all included RNA-Seq data sets sorted by species.

652 **Additional file 3. RNA-Seq based splice site validation.** Schematic illustration how the  
653 splitted mapping of RNA-Seq reads (arrows) over exons (red) and introns (grey) was used to  
654 validate splice sites. The read coverage depth should drop when moving from an exon into  
655 an intron.

656 **Additional file 4. Phylogenetic tree.** RbcL sequences were used to construct a  
657 phylogenetic tree of all species involved in the analysis. Missing data points were corrected  
658 by relying on the NCBI taxonomy thus the branch lengths are not to scale.

659 **Additional file 5. Genome statistics.** Statistical information about each analyzed genome  
660 sequence and the average values across all species are listed.

661 **Additional file 6. Number of splice sites per species.** Canonical and non-canonical splice  
662 sites were counted per species as described in the method section.

663 **Additional file 7. Splice site diversity per species.** The occurrence of all possible splice  
664 site combinations was counted for all species as described in the method section.



665 **Additional file 8. Similarity of the non-canonical splice site pattern across plants.** The  
666 Spearman correlation coefficient between each pair of plants was calculated based on the  
667 observed frequency of all possible splice site combinations. Red color indicates similarity  
668 while blue color indicates substantial differences.

669 **Additional file 9. Correlation of splice site frequencies with genome size.** For each  
670 investigated species the number of canonical and non-canonical splice sites is displayed.  
671 The Spearman correlation coefficient between splice site number and genome size is  $r=0.14$   
672 for canonical splice sites and  $r=0.02$  for non-canonical splice sites.

673 **Additional file 10. Genome-wide distribution of non-canonical splice sites in *A.***  
674 ***thaliana*.** The distribution of genes with non-canonical splice sites (red dots) across the five  
675 chromosome sequences (black lines) of *A. thaliana* was analysed.

676 **Additional file 11. Genome-wide distribution of non-canonical splice sites in *B.***  
677 ***vulgaris*.** The distribution of genes with non-canonical splice sites (red dots) across the nine  
678 chromosome sequences (black lines) of *B. vulgaris* was analysed.

679 **Additional file 12. Genome-wide distribution of non-canonical splice sites in *V. vinifera*.**  
680 The distribution of genes with non-canonical splice sites (red dots) across the nineteen  
681 chromosome sequences (black lines) of *V. vinifera* was analysed.

682 **Additional file 13. Conserved sequences around splice sites in *Oryza sativa*.** Predicted  
683 splice site combinations observed in *Oryza sativa* are indicated by a black line below them.  
684 Donor splice sites are on the left, acceptor splice sites on the right. The minor non-canonical  
685 splice combination CA-GG at the top could be converted into the major non-canonical GC-  
686 AG combination by just shifting one nucleotide to the left. The presence of two Gs at the  
687 acceptor splice site seems to correlate with the prediction of this CA-GG splice site  
688 combination instead of a major non-canonical GC-AG.

689 **Additional file 14. Non-canonical splice sites in single copy genes.** The occurrence of  
690 non-canonical splice sites in single copy genes (BUSCO) and in all genes was assessed per  
691 species.

692 **Additional file 15. Proportion of non-canonical splice sites.** The green line indicates the  
693 average (median) proportion of genes with a non-canonical splice site combination. Grey  
694 lines indicate the range between 25% and 75% quantiles. Genes with more introns are more  
695 likely to have a non-canonical splice site combination. There is an almost perfect correlation  
696 up to 40 introns per gene. Insufficient sample sizes above this intron number prevent further  
697 analyses.

698 **Additional file 16. Conservation of non-canonical splice sites.** Non-canonical splice sites  
699 at conserved positions in putative homologous of At1g79350 across various species.

700 **Additional file 17. Supported splice sites.** Percentage of splice sites supported by RNA-  
701 Seq reads is given per species.

702 **Additional file 18. RNA-Seq data set sizes.** There is a moderate correlation between the  
703 amount of bases in the used RNA-Seq data sets and the number of supported splice sites.  
704 The trend is similar for canonical ( $r=0.46$ ) and non-canonical ( $r=0.43$ ) splice site  
705 combinations.

706

707

708 **Fig. 1: Correlation between splice site sequence divergence and frequency.** Spearman  
709 correlation coefficient between the splice site combination divergence from the canonical GT-  
710 AG and their frequency is  $r=-0.43$  ( $p\text{-value} = 7*10^{-13}$ ).

711 **Fig. 2: Splice site combination frequency.** The frequencies of selected splice site  
712 combinations across 121 plant species are displayed. Splice site combinations with high

713 similarity to the canonical GT-AG or the major non-canonical GC-AG/AT-AC are more  
714 frequent than other splice site combinations.

715 **Fig. 3: Intron length distribution.** Length distribution of introns with canonical (green) and  
716 non-canonical (red) splice site combinations are displayed. Values of all species are  
717 combined in this plot resulting in a consensus curve. Most striking differences are (1) at the  
718 intron length peak around 200 bp where non-canonical splice site combinations are less  
719 likely and (2) at very long intron lengths where introns with non-canonical splice sites are  
720 more likely.

721 **Fig. 4: Splice site frequency.** Occurrences of the canonical GT-AG, the major non-  
722 canonical GC-AG and AT-AC as well as the combined occurrences of all minor non-  
723 canonical splice sites (others) are displayed. The proportion of GT-AG is about 98.7%. There  
724 is some variation, but most species show GC-AG at about 1.2% and AT-AC at 0.06%. All  
725 others combined account usually for about 0.09% as well.

726 **Fig. 5: Usage of splice sites.** Usage of splice sites was calculated based on the number of  
727 RNA-Seq reads supporting the exon next to a splice site and the number of reads supporting  
728 the intron containing the splice site. There is a substantial difference between the usage of 5'  
729 and 3' splice sites in favor of the 5' splice sites. Canonical GT-AG splice site combinations  
730 are used more often than major or minor non-canonical splice site combinations.

731

average number of observed splice sites across species

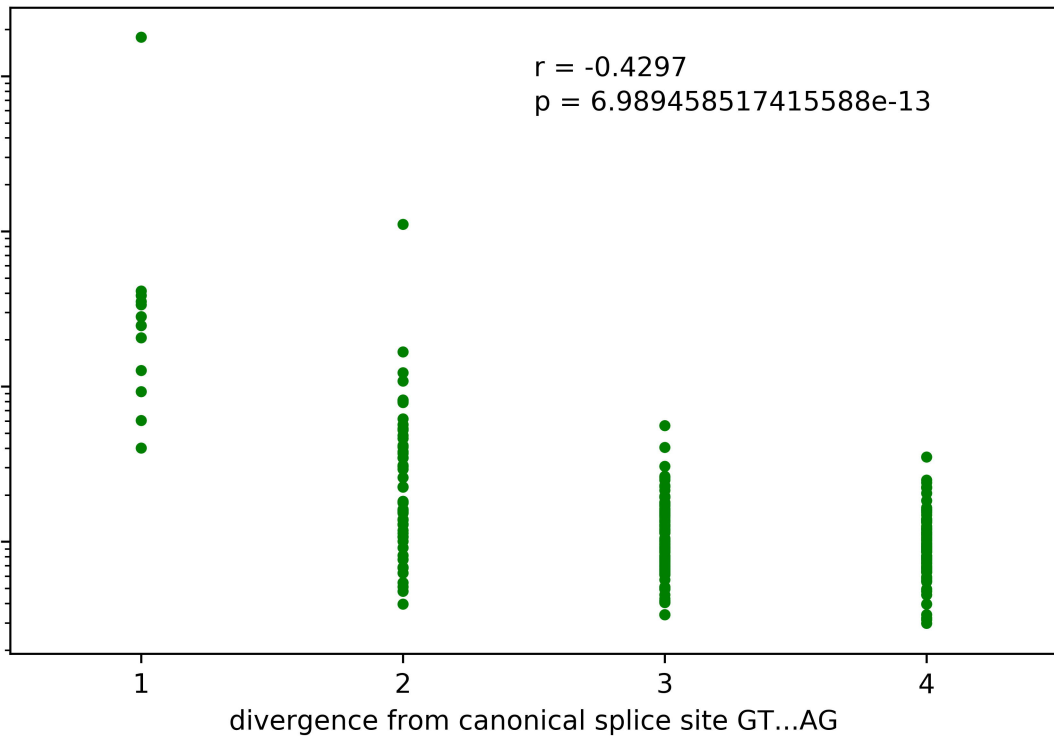

frequency in plant genomes

$10^0$   
 $10^1$   
 $10^2$   
 $10^3$   
 $10^4$   
 $10^5$

AT...AA

AT...AC

AT...AG

AA...AA

AT...AG

GA...AG

GT...AG

GC...AG

GT...AA

GT...GG

GT...AT

splice site combinations

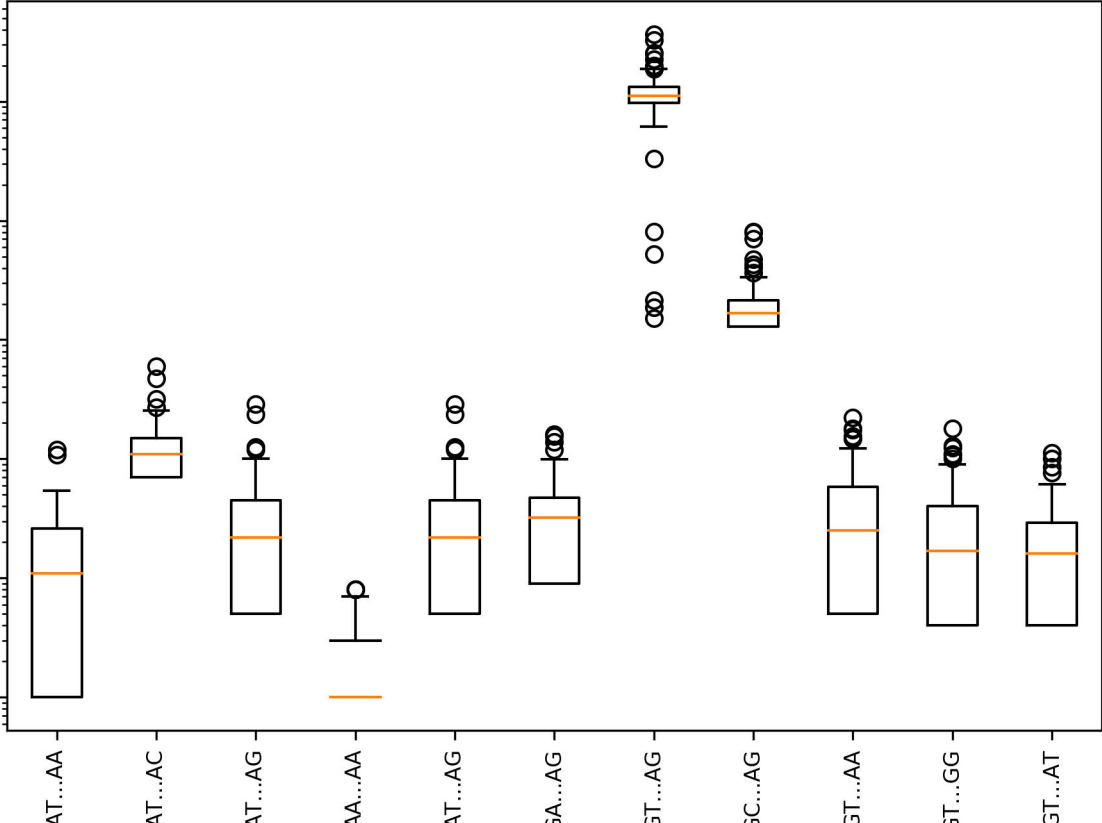

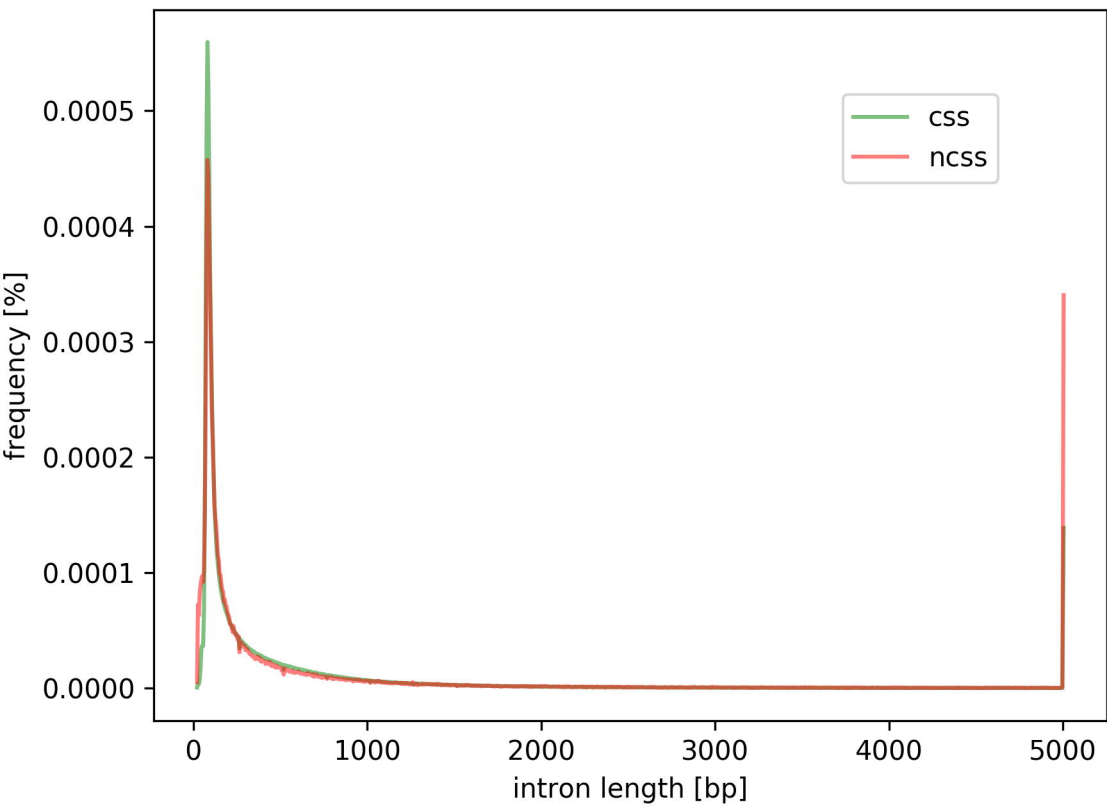

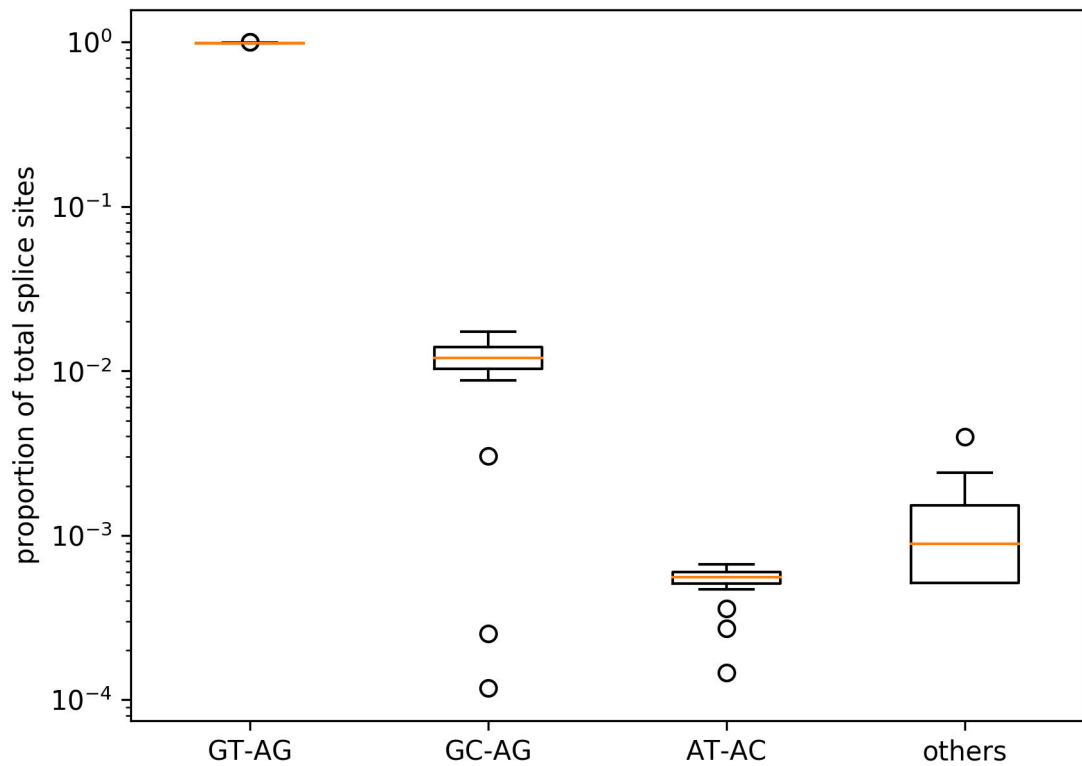

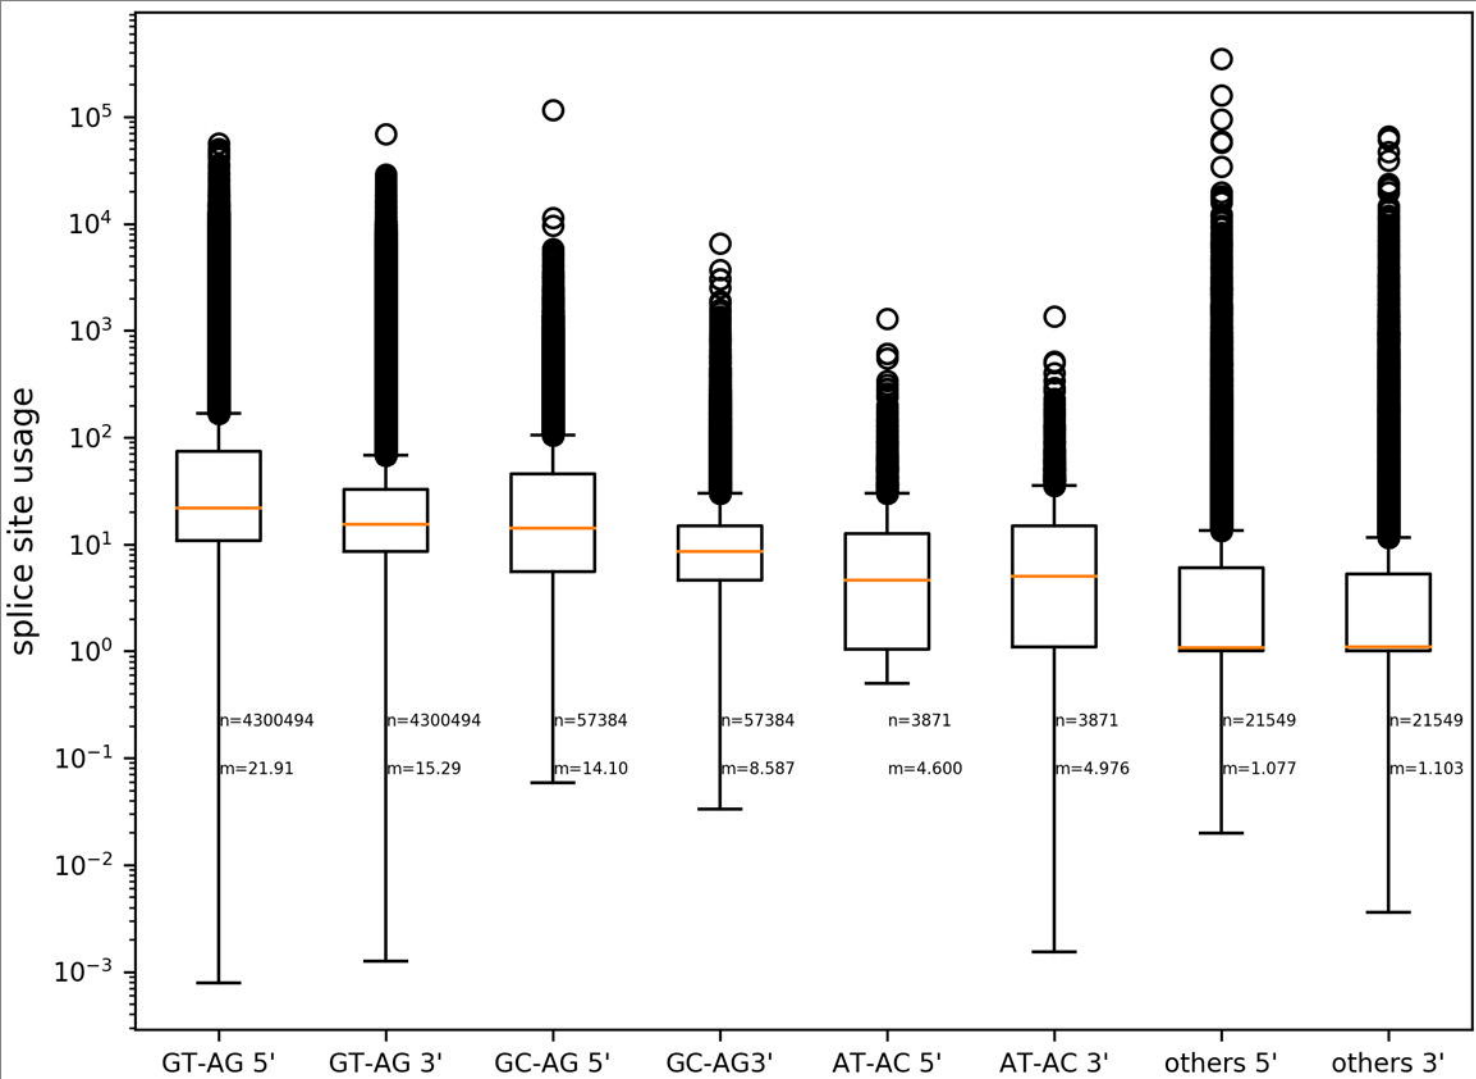

Source: https://www.biorxiv.org/content/10.1101/428318v1.full.pdf
