1 **Genome-wide analyses supported by RNA-Seq reveal non-canonical splice sites in**  
2 **plant genomes**

3 Boas Pucker<sup>1,2</sup>, Samuel F. Brockington<sup>1</sup>

4 1 Evolution and Diversity, Department of Plant Sciences, University of Cambridge,  
5 Cambridge, United Kingdom

6 2 Genetics and Genomics of Plants, CeBiTec & Faculty of Biology, Bielefeld University,  
7 Bielefeld, Germany

8 \* corresponding author: Boas Pucker, [bpucker@cebitec.uni-bielefeld.de](mailto:bpucker@cebitec.uni-bielefeld.de)

9

10 BP: [bpucker@cebitec.uni-bielefeld.de](mailto:bpucker@cebitec.uni-bielefeld.de)

11 SFB: [sb771@cam.ac.uk](mailto:sb771@cam.ac.uk)

12

13

14 Key words: gene structure, splicing, annotation, comparative genomics, transcriptomics,  
15 gene expression, natural diversity, evolution

16

17

18

19

20

21

22

## 23 **Abstract**

24 Most eukaryotic genes comprise exons and introns thus requiring the precise removal of  
25 introns from pre-mRNAs to enable protein biosynthesis. U2 and U12 spliceosomes catalyze  
26 this step by recognizing motifs on the transcript in order to remove the introns. A process  
27 which is dependent on precise definition of exon-intron borders by splice sites, which are  
28 consequently highly conserved across species. Only very few combinations of terminal  
29 dinucleotides are frequently observed at intron ends, dominated by the canonical GT-AG  
30 splice sites on the DNA level.

31 Here we investigate the occurrence of diverse combinations of dinucleotides at predicted  
32 splice sites. Analyzing 121 plant genome sequences based on their annotation revealed  
33 strong splice site conservation across species, annotation errors, and true biological  
34 divergence from canonical splice sites. The frequency of non-canonical splice sites clearly  
35 correlates with their divergence from canonical ones indicating either an accumulation of  
36 probably neutral mutations, or evolution towards canonical splice sites. Strong conservation  
37 across multiple species and non-random accumulation of substitutions in splice sites indicate  
38 a functional relevance of non-canonical splice sites. The average composition of splice sites  
39 across all investigated species is 98.7% for GT-AG, 1.2% for GC-AG, 0.06% for AT-AC, and  
40 0.09% for minor non-canonical splice sites. RNA-Seq data sets of 35 species were  
41 incorporated to validate non-canonical splice site predictions through gaps in sequencing  
42 reads alignments and to demonstrate the expression of affected genes. We conclude that  
43 *bona fide* non-canonical splice sites are present and appear to be functionally relevant in  
44 most plant genomes, if at low abundance.

45

46

47

48

## 49 **Introduction**

50 Introns separate eukaryotic genes into exons [1, 2]. After their likely origin as selfish  
51 elements [3], introns subsequently evolved into beneficial components in eukaryotic  
52 genomes [4–6]. Historical debates concerning the evolutionary history of introns led to the  
53 “introns-first-hypothesis” which proposes that introns were already present in the last  
54 common ancestor of all eukaryotes [3, 7]. Although this putative ancestral genome is inferred  
55 to be intron-rich, several plant genomes accumulated more introns during their evolution  
56 generating the highly fragmented gene structures with average intron numbers between six  
57 and seven [8]. Introner elements (IEs) [9], which behave similar to transposable elements,  
58 are one possible mechanism for the amplification of introns [10]. Early introns probably  
59 originated from self-splicing class II introns [3, 11] and evolved into passive elements, that  
60 require removal by eukaryote-specific molecular machineries [11]. No class II introns were  
61 identified in the nuclear genomes of sequenced extant eukaryotes [11] except for  
62 mitochondrial DNA (mtDNA) insertions [12, 13].

63 The removal of these introns during pre-mRNA processing is a complex and expensive step,  
64 which involves 5 snoRNAs and over 150 proteins building the spliceosome [14]. In fact, a  
65 major U2 [15] and a minor U12 spliceosome [16] are removing different intron types from  
66 eukaryotic pre-mRNAs [17]. The major U2 spliceosome mostly recognises canonical GT-AG  
67 introns, but is additionally reported to remove AT-AC class I introns [18]. Non-canonical AT-  
68 AC class II introns are spliced by the minor U2 spliceosome, which is also capable of  
69 removing some GT-AG introns [18, 19]. Highly conserved cis-regulatory sequences are  
70 required for the correct spliceosome recruitment to designated splice sites [20–22]. Although  
71 these sequences pose potential for deleterious mutations [4], some intron positions are  
72 conserved between very distant eukaryotic species like *Homo sapiens* and *Arabidopsis*  
73 *thaliana* [23].

74 Among the most important recognition sequences of spliceosomes are dinucleotides at both  
75 ends of spliceosomal introns which show almost no variation from GT at the 5' end and AG

76 at the 3' end, respectively [24]. Different types of alternative splicing generate diversity at the  
77 transcript level by combining exons in different combinations [25]. This process results in a  
78 substantially increased diversity of peptide sequences [2, 26]. Special splicing cases e.g.  
79 utilizing a single nucleotide within an intron for recursive splicing [27] or generating circular  
80 RNAs [28] are called non-canonical splicing events [25] and build an additional layer of RNA  
81 and proteomic diversity. If this process is based on splice sites differing from GT-AG those  
82 splice sites are called non-canonical. Non-canonical splice sites were first identified before  
83 genome sequences became available on a massive scale (reviewed in [29]). GC-AG and AT-  
84 AC are classified as major non-canonical splice site combinations, while all deviations from  
85 these sequences are deemed to be minor non-canonical splice sites. More recently,  
86 advances in sequencing technologies and the development of novel sequence alignment  
87 tools now enable a systematic investigation of non-canonical splicing events [25, 30].  
88 Comprehensive genome sequence assemblies and large RNA-Seq data sets are publicly  
89 available. Dedicated split-read aligners like STAR [31, 32] are able to detect non-canonical  
90 splice sites during the alignment of RNA-Seq reads to genomic sequences. Numerous  
91 differences in annotated non-canonical splice sites even between accessions of the same  
92 species [30] as well as the extremely low frequency of all non-canonical splice sites indicate  
93 that sequencing, assembly, and annotation are potential major sources of erroneously  
94 inferred splice sites [29, 30, 33]. Distinguishing functional splice sites from degraded  
95 sequences such as in pseudogenes is also still an unsolved issue. Nonetheless, the  
96 combined number of currently inferred minor non-canonical splice site combinations is even  
97 higher than the number of the major non-canonical AT-AC splice site combinations [30, 34].  
98 Here, we analysed 121 whole genome sequences from across the entire plant kingdom to  
99 harness the power of a very large sample size and genomic variation accumulated over  
100 extensive periods of evolutionary time, to better understand splice site combinations.  
101 Although, only a small number of splice sites are considered as non-canonical, the potential  
102 number in 121 species is large. Furthermore, conservation of sequences between these  
103 species over a long evolutionary time scale may also serve as a strong indication for their

104 functional relevance. We incorporated RNA-Seq data to differentiate between artifacts and  
105 *bona fide* cases of active non-canonical splice sites. Active splice sites are revealed by an  
106 RNA-Seq read alignment allowing quantification of splice site activity. We then identified  
107 homologous non-canonical splice sites across species and subjected the genes containing  
108 these splice sites to phylogenetic analyses. Conservation over a long evolutionary time,  
109 expression of the effected gene, and RNA-Seq reads spanning the predicted intron served  
110 as evidence to identify *bona fide* functional non-canonical splice site combinations.

111

## 112 **Materials & Methods**

### 113 **Collection of data sets and quality control**

114 Genome sequences (FASTA) and the corresponding annotation (GFF3) of 121 plant species  
115 (Additional file 1) were retrieved from the NCBI. Since all annotations were generated by  
116 GNOMON [35], these data sets should have an equal quality and thus allow comparisons  
117 between them. BUSCO v3 [36] was deployed to assess the completeness and duplication  
118 level of all sets of representative peptide sequences using the reference data set  
119 'embryophyta odb9'.

120

### 121 **Classification of annotated splice sites**

122 Genome sequences and their annotation were processed by a Python script to identify the  
123 representative transcript per gene defined as the transcript that encodes the longest  
124 polypeptide sequence [30, 37]. Like all custom Python scripts relevant for this work, it is  
125 available with additional instructions at <https://github.com/bpucker/ncss2018>. Genes with  
126 putative annotation errors or inconsistencies were filtered out as done before in similar  
127 analyses [38]. Focusing on the longest peptide is essential to avoid biases caused by  
128 different numbers of annotated isoforms in different species. Splice sites within the coding  
129 sequence of the longest transcripts were analyzed by extracting dinucleotides at the borders

130 of all introns. Untranslated regions (UTRs) were avoided due to their more challenging and  
131 thus less reliable prediction [30, 39]. Splice sites and other sequences will be described  
132 based on their encoding DNA sequence (e.g. GT instead of GU for the conserved  
133 dinucleotide at the donor splice site). Based on terminal dinucleotides in introns, splice site  
134 combinations were classified as canonical (GT-AG) or non-canonical if they diverged from  
135 the canonical motif. A more detailed classification into major non-canonical splice site  
136 combinations (GC-AG, AT-AC) and all remaining minor non-canonical splice site  
137 combinations was applied. All following analyses were focused on introns and intron-like  
138 sequences equal or greater than 20 bp.

139

#### 140 **Investigation of splice site diversity**

141 A Python script was applied to summarize all annotated combinations of splice sites that  
142 were detected in a representative transcript. The specific profile comprising frequency and  
143 diversity of splice site combinations in individual species was analyzed. Splice site  
144 combinations containing ambiguity characters were masked from this analysis as they are  
145 most likely caused by sequencing or annotation errors. Spearman correlation coefficients  
146 were computed pairwise between the splice site profiles of two species to measure their  
147 similarity. Flanking sequences of CA-GG and GC-AG splice sites in rice were investigated,  
148 because CA-GG splice sites seemed to be the result of an erroneous alignment. The  
149 conservation of flanking sequences was illustrated based on sequence web logos  
150 constructed at <https://weblogo.berkeley.edu/logo.cgi>.

151

#### 152 **Analysis of splice site conservation**

153 Selected protein encoding transcript sequences with non-canonical splice sites were  
154 subjected to a search via BLASTn v2.2.28+ [40] to identify homologues in other species to  
155 investigate the conservation of splice sites across plant species. As proof of concept, one

156 previously validated non-canonical splice site containing gene [30], At1g79350 (rna15125),  
157 was investigated in more depth. Homologous transcripts were compared based on their  
158 annotation to investigate the conservation of non-canonical splice sites across species.  
159 Exon-intron structures of selected transcripts were plotted by a Python script using matplotlib  
160 [41] to facilitate manual inspection.

161

## 162 **Validation of annotated splice sites**

163 Publicly available RNA-Seq data sets of different species (Additional file 2) were retrieved  
164 from the Sequence Read Archive [42]. Whenever possible, samples from different tissues  
165 and conditions were included. The selection was restricted to paired-end data sets to provide  
166 a high accuracy during the read mapping. Only species with multiple available data sets were  
167 considered for this analysis. All reads were mapped via STAR v2.5.1b [31] in 2-pass mode to  
168 the corresponding genome sequence using previously described cutoff values [43]. A Python  
169 script utilizing BEDTools v2.25.0 [44] was deployed to convert the resulting BAM files into  
170 customized coverage files. Next, the read coverage depth at all exon-intron borders was  
171 calculated based on the terminal nucleotides of an intron and the flanking exons. Splice sites  
172 were considered as supported by RNA-Seq if the read coverage depth dropped by at least  
173 20% when moving from an exon into an intron (Additional file 3).

174

## 175 **Phylogenetic tree construction**

176 RbcL (large RuBisCO subunit) sequences of almost all investigated species were retrieved  
177 from the NCBI for the construction of a phylogenetic tree. MAFFT v.7 [45] was deployed to  
178 generate an alignment which was trimmed to a minimal occupancy of 60% in each alignment  
179 column and finally subjected to FastTree v.2.1.10 [46] for tree construction. Species without  
180 an available RbcL sequence were integrated manually by constructing subtrees based on  
181 scientific names via phyloT (<https://phyloT.biobyte.de/>). Due to these manual adjustments, the

182 branch lengths in the resulting tree are not accurate and only the topology (Additional file 4)  
183 was considered for further analyses.

184

### 185 **Intron length analyses**

186 Stress-related gene IDs of *A. thaliana* were retrieved from the literature [47] and  
187 corresponding genes in the NCBI annotations were identified through reciprocal best BLAST  
188 hits as previously described [48]. Lengths of introns in these stress genes were compared  
189 against an equal number of randomly selected intron lengths from all remaining genes using  
190 the Wilcoxon test as implemented in the Python module *scipy*. Average values of the stress  
191 gene intron lengths as well as the randomly selected intron lengths were compared. This  
192 random selection and the following comparison were repeated 100 times to correct for  
193 random effects.

194 Minor non-canonical splice site combinations without ambiguous bases in introns longer than  
195 5kb were counted and compared against their frequency in shorter introns. After ranking all  
196 splice site combinations by this ratio, the frequency of the four bases A, C, G, and T was  
197 analyzed in correlation to their position in this list.

198

### 199 **Comparison of non-canonical splice sites to overall sequence variation**

200 A previously generated variant data set [48] was used to identify the general pattern of  
201 mutation and variant fixation between the two *A. thaliana* accessions Columbia-0 and  
202 Niederzenz-1. All homozygous SNPs in a given VCF file were considered for the calculation  
203 of nucleotide substitution rates. Corresponding substitution rates were calculated for all minor  
204 non-canonical splice sites by assuming they originated from the closest sequence among  
205 GT-AG, GC-AG, and AT-AC. General substitution rates in a species were compared against  
206 the observed substitution in minor non-canonical splice sites via  $\chi^2$  test.



207

## 208 **Results**

### 209 **Genomic properties of plants and diversity of non-canonical splice sites**

210 Comparison of all genomic data sets revealed an average GC content of 36.3%, an average  
211 percentage of 7.8% of protein encoding sequence, and on average 95.7% of complete  
212 BUSCO genes (Additional file 5). Averaged across all 121 genomes, a genome contains an  
213 average of 27,232 genes with 4.5 introns per gene. The number of introns per gene was only  
214 slightly reduced to 4.15 when only introns enclosed by coding exons were considered for this  
215 analysis.

216 Our investigation of these 121 plant genome sequences revealed a huge variety of different  
217 non-canonical splice site combinations (Additional file 6, Additional file 7). Nevertheless,  
218 most of all annotated introns display the canonical GT-AG dinucleotides at their borders.  
219 Despite the presence of a huge amount of non-canonical splice sites in almost all plant  
220 genomes, the present types and the frequencies of different types show a huge variation  
221 between species (Additional file 8). A phylogenetic signal in this data set is weak if it is  
222 present at all. The total number of splice site combinations ranged between 1,505  
223 (*Bathycoccus prasinos*) and 372,164 (*Brassica napus*). Algae displayed a very low number  
224 of minor non-canonical splice site combinations, but other plant genome annotations within  
225 land plants also did not contain any minor non-canonical splice site combinations without  
226 ambiguity characters e.g. *Medicago truncatula*. *Camelina sativa* displayed the highest  
227 number of minor non-canonical splice site combinations (2,902). There is a strong correlation  
228 between the number of non-canonical splice site combinations and the total number of splice  
229 sites (Spearman correlation coefficient=0.53, p-value=5.5\*10<sup>-10</sup>). However, there is almost no  
230 correlation between the number of splice sites and the genome size (Additional file 9).

231

### 232 **Non-canonical splice sites are likely to be similar to canonical splice sites**

233 There is a negative correlation between the frequency of non-canonical splice site  
234 combinations and their divergence from canonical sequences ( $r = -0.4297$   $p\text{-value} = 7e-13$ ;  
235 Fig.1; Additional file 7). Splice sites with one difference to a canonical splice site are more  
236 frequent than more diverged splice sites. A similar trend can be observed around the major  
237 non-canonical splice sites AT-AC (Fig.2) and the canonical GT-AG. Comparison of the  
238 overall nucleotide substitution rate in the plant genome and the divergence of minor non-  
239 canonical splice sites from canonical or major non-canonical splice sites revealed significant  
240 differences ( $p\text{-value} = 0$ ,  $\chi^2$  test). For example, the substitutions of A by C and A by G were  
241 observed with a similar frequency at splice sites, while the substitution of A by G is almost  
242 three times as likely as the A by C substitution between the *A. thaliana* accessions Col-0 and  
243 Nd-1.

244 The genome-wide distribution of genes with non-canonical splice sites did not reveal striking  
245 patterns. When looking at the chromosome-level genome sequences of *A. thaliana*, *B.*  
246 *vulgaris*, and *V. vinifera* (Additional file 10, Additional file 11, Additional file 12), there were  
247 slightly less genes with non-canonical splice sites close to the centromere. However, the total  
248 number of genes was reduced in these regions as well, so likely correlated with genic  
249 content.

250

251 One interesting species-specific property was the high frequency of non-canonical CA-GG  
252 splice site combinations in *Oryza sativa* which is accompanied by a low frequency of the  
253 major non-canonical GC-AG splice sites. In total, 233 CA-GG splice site combinations were  
254 identified. However, the transcript sequences can be aligned in a different way to support  
255 GC-AG sites close to and even overlapping with the annotated CA-GG splice sites. RNA-Seq  
256 reads supported 224 of these CA-GG splice sites. Flanking sequences of CA-GG and GC-  
257 AG splice sites were extracted and aligned to investigate the reason for these erroneous  
258 transcript alignments (Additional file 13). An additional G directly downstream of the 3' AG  
259 splice site was only present when this splice site was predicted as GG. Cases where the GC-

260 AG was predicted lack this G thus preventing the annotation of a CA-GG splice site  
261 combination.

262

### 263 **Non-canonical splice sites in single copy genes**

264 To assess the impact of gene copy number on the presence of non-canonical splice sites, we  
265 compared a group of presumably single copy genes against all other genes. The average  
266 percentage of genes with non-canonical splice sites among single copy BUSCO genes was  
267 11.4%. The average percentage among all genes was only 10.4%. This uncorrected  
268 difference between both groups is statistically significant ( $p=0.04$ , Mann-Whitney U test), but  
269 species-specific effects were obvious. While the percentage in some species is almost the  
270 same, other species show a much higher percentage of genes with non-canonical splice  
271 sites among BUSCO genes (Additional file 14). A couple of species displayed an inverted  
272 situation, having less genes with non-canonical splice sites among the BUSCO genes than  
273 the genome-wide average.

274

### 275 **Intron analysis**

276 Length distributions of introns with canonical and non-canonical splice site combinations are  
277 similar in most regions (Fig.3). However, there are three striking differences between both  
278 distributions: i) the higher abundance of very short introns with non-canonical splice sites, ii)  
279 the lower peak at the most frequent intron length (around 200 bp), and iii) the high  
280 percentage of introns with non-canonical splice sites that are longer than 5 kb. These  
281 distributions indicate that non-canonical splice sites are more frequent in introns that deviate  
282 from the average length. Although the total number of introns with canonical splice sites  
283 longer than 5 kb is much higher, the proportion of non-canonical splice sites containing  
284 introns is on average at least twice as high as the proportion of introns with canonical splice  
285 site combinations. These differences between both distributions are significant (Wilcoxon

286 test, p-value=0.02). Although differences in the frequency of non-canonical splice site  
287 combinations in introns longer than 5kb exist, no clear pattern of preferred motifs was  
288 detected. However, it seems that G might be underrepresented in frequent splice sit  
289 combinations in these long introns.

290 Stress-related genes were checked for increased intron sizes, because non-canonical splice  
291 site combinations might be associated with stress-response. Comparison of stress-related  
292 genes in *A. thaliana*, *Beta vulgaris*, *Brassica oleracea*, *B.napus*, *B.rapa*, and *Vitis vinifera* did  
293 not reveal a substantially increased intron size in these genes.

294 The likelihood of having a non-canonical splice site in a gene is almost perfectly correlated  
295 with the number of introns (Additional file 15). Analyzing this correlation across all plant  
296 species resulted in a sufficiently large sample size to see this effect even in genes with about  
297 40 introns. Insufficient sample sizes kept us from investigating it for genes with even more  
298 introns.

299

### 300 **Conservation of non-canonical splice sites**

301 Non-canonical splice site combinations detected in *A. thaliana* Col-0 were compared to  
302 single nucleotide polymorphisms of 1,135 accessions which were studied as part of the 1001  
303 genomes project. Of 1,296 non-canonical splice site combinations, 109 overlapped with  
304 listed variant positions. At 21 of those positions, the majority of all accessions displayed the  
305 Col-0 allele, while the remaining 88 positions were dominated by other alleles.

306 To differentiate between randomly occurring non-canonical splice sites (e.g. sequencing  
307 errors) and true biological variation, the conservation of non-canonical splice sites across  
308 multiple species can be analyzed. This approach was demonstrated for the selected  
309 candidate At1g79350 (rna15125). Manual inspection revealed that non-canonical splice sites  
310 were conserved in three positions in many putative homologous genes across various  
311 species (Additional file 16).

312

### 313 **RNA-Seq-based validation of annotated splice sites**

314 RNA-Seq reads of 35 different species (Additional file 2) were mapped to the respective  
315 genome sequence to allow the validation of splice sites based on changes in the read  
316 coverage depth (Additional file 3, Additional file 17). Validation ratios of all splice sites ranged  
317 from 75.5% in *Medicago truncatula* to 96.4% in *Musa acuminata*. A moderate correlation  
318 ( $r=0.46$ ) between the amount of RNA-Seq reads and the ratio of validated splice sites was  
319 observed (Additional file 18). When only considering non-canonical splice sites, the validation  
320 ranged from 15.2% to 91.3% displaying a similar correlation with the amount of sequencing  
321 reads. Based on validated splice sites, the proportion of different splice site combinations  
322 was analyzed across all species (Fig.4). The average percentages are approximately 98.7%  
323 for GT-AG, 1.2% for GC-AG, 0.06% for AT-AC, and 0.09% for all other minor splice site  
324 combinations. *Medicago truncatula*, *Oryza sativa*, *Populus trichocarpa*, *Monoraphidium*  
325 *neglectum*, and *Morus notabilis* displayed substantially lower validation values for the major  
326 non-canonical splice sites.

327

### 328 **Quantification of splice site usage**

329 Based on mapped RNA-Seq reads, the usage of different splice sites was quantified (Fig.5;  
330 [49]). Canonical GT-AG splice site combinations displayed the strongest RNA-Seq read  
331 coverage drop when moving from an exon into an intron (Additional file 3). There was a  
332 substantial difference in average splice site usage between 5' and the 3' ends of GT-AG  
333 introns. The same trend holds true for major non-canonical GC-AG splice site combinations,  
334 while the total splice site usage is lower. Major non-canonical AT-AC and minor non-  
335 canonical splice sites did not show a difference between 5' and 3' end. However, the total  
336 usage values of AT-AC are even lower than the values of GC-AG splice sites.

337 There is a significant correlation between the usage of a 5' splice site and the corresponding  
338 3' splice site. However, the Spearman correlation coefficient varies between all four groups  
339 of splice sites ranging from 0.42 in minor non-canonical splice site combinations to 0.82 in  
340 major non-canonical AT-AC splice site combinations.

341 In order to provide an example for the usage of minor non-canonical splice sites under stress  
342 conditions, four single RNA-Seq datasets of *B. vulgaris* were processed separately. They are  
343 the comparison of control vs. salt and control vs. high light [50]. The number of RNA-Seq  
344 supported minor non-canonical splice sites increased between control and stress conditions  
345 from 17 to 19 and from 21 to 24, respectively. GT-TA and AA-TA were only supported by  
346 RNA-Seq reads derived from samples under stress conditions.

347

348

## 349 **Discussion**

350 This inspection of non-canonical splice sites annotated in plant genome sequences was  
351 performed to capture the diversity and to assess the validity of these annotations, because  
352 previous studies indicate that annotations of non-canonical splice sites are a mixture of  
353 artifacts and *bona fide* splice sites [29, 34, 51]. Our results update and expand previous  
354 systematic analyses of non-canonical splice sites in smaller data sets [29, 30, 33, 34]. An  
355 extended knowledge about non-canonical splice sites in plants could benefit gene predictions  
356 [30, 52], as novel genome sequences are often annotated by lifting an existing annotation.

357

### 358 **Confirmation of *bona fide* splicing from minor non-canonical combinations**

359 Our analyses supported a variety of different non-canonical splice sites matching previous  
360 reports of *bona fide* non-canonical splice sites [29, 30, 34, 51]. Frequencies of different minor  
361 non-canonical splice site combinations are not random and vary between different

362 combinations. Those combinations similar to the canonical combination or the major non-  
363 canonical splice site combinations are more frequent. Furthermore, our RNA-Seq analyses  
364 demonstrate the actual use of non-canonical splice sites, revealing a huge variety of different  
365 transcripts derived from non-canonical splice sites, which may be evolutionarily significant.  
366 Although, some non-canonical splice sites may be located in pseudogenes, the  
367 transcriptional activity and accurate splicing at most non-canonical splice sites indicates  
368 functional relevance e.g. by contributing to functional diversity as previously postulated [2,  
369 25, 26]. These findings are consistent with published reports that have demonstrated  
370 functional RNAs generated from non-canonical splice sites [30, 53].

371 In general, the pattern of non-canonical splice sites is very similar between species with  
372 major non-canonical splice sites accounting for most cases of non-canonical splicing. While  
373 the average across plants of 98.7% GT-AG canonical splice sites is in agreement with recent  
374 reports for *A. thaliana* [30], it is slightly lower than 99.2 % predicted for mammals [33] or  
375 99.3% as previously reported for Arabidopsis based on cDNAs [54]. In contrast, the  
376 frequency of major non-canonical GC-AG splice sites in plants is almost twice the value  
377 reported for mammals [33]. Most importantly the proportion of 0.09% minor non-canonical  
378 splice site combinations in plants is substantially higher than the estimation of 0.02% initially  
379 reported for mammals [33]. Taking these findings together, both major and minor non-  
380 canonical splice sites could be a more significant phenomenon of splicing in plants than in  
381 animals. This hypothesis would be consistent with the notion that splicing in plants is a more  
382 complex and diverse process than that occurring in metazoan lineages [55–57]. An in-depth  
383 investigation of non-canonical splice sites in animals and fungi would be needed to validate  
384 this hypothesis.

385

### 386 **Species-specific differences in minor non-canonical splice site combinations**

387 As previous studies on non-canonical splice sites were often focused on one species [54] or  
388 a few model organisms [33, 34, 38], the observed variation among the plant genomes

389 investigated here updates the current knowledge and revealed potential species-specific  
390 differences. However, small numbers of non-canonical splice sites in some species might  
391 prevent the detection of phylogenetic patterns in the genome-wide analysis. Nevertheless,  
392 conserved non-canonical splice site positions exist as presented on the gene level for  
393 At1g79350. Differences in the availability of hints in the gene prediction process and variation  
394 in the assembly quality might contribute to the observed differences in the number of non-  
395 canonical splice sites between closely related species.

396 The group of minor non-canonical splice sites displayed the largest variation between  
397 species, and a frequent non-canonical splice site combination (CA-GG) which appeared  
398 peculiar to *O. sativa* is probably due to an alignment error. In other words, the predicted CA-  
399 GG splice site combinations in rice can be conceived as major non-canonical GC-AG events  
400 by just splitting the transcript sequence in a different way during the alignment over the  
401 intron. An additional downstream G at the 3' splice site seems to be responsible for leading  
402 to this annotation, because cases where GC-AG was correctly annotated do not display this  
403 G in the respective position. Dedicated alignment tools are needed to bioinformatically  
404 distinguish these events [58], otherwise manual inspection must be used to correctly resolve  
405 these situations.

406 Despite all artifacts described here and elsewhere [29, 33, 59], non-canonical splice sites  
407 seem to have conserved functions as indicated by conservation over long evolutionary  
408 periods displayed as presence in homologous sequences in multiple species [23, 29]. Our  
409 own analyses across multiple accessions of *A. thaliana* support this conjecture and suggest  
410 that some non-canonical splice sites are conserved in homologous loci at the intra-specific  
411 level. At the same time, there is intra-specific variability [30] that might be attributed to the  
412 accumulation of mutations prior to purifying selection. Assessing the variability within a  
413 species could be an additional approach to distinguish *bona fide* splice sites from artifacts or  
414 recent mutations.

415



## 416 **Putative mechanisms for processing of minor non-canonical splice sites**

417 We sought to understand possible correlations with minor non-canonical splice site  
418 combinations in order understand the mechanisms driving their occurrence. Therefore, we  
419 explored the impact of genomic position relative to centromeres, the effect of increased gene  
420 number, and the impact of intron length. The occurrence of non-canonical splice sites is  
421 reduced with proximity to the centromere, but this is likely due to reduced gene content in  
422 centromeric regions. Averaged across all species, there a significantly higher proportion of  
423 non-canonical sites in single copy genes, but species-specific differences also violate this  
424 observation, suggesting that gene copy number is not an important determinant. However,  
425 non-canonical splice sites may be more important in splicing very long introns, because they  
426 appear in introns above 5 kb with a higher relative likelihood than canonical splice sites.  
427 Further investigations are needed to validate the observed lack of G in these splice site  
428 combinations and to identify an underlying pattern if it exists. When looking for an association  
429 of long introns with stress-related genes, no significant increase in their intron sizes was  
430 observed. However, it is still possible that these long introns belong to genes which were not  
431 previously described in relation to stress.

432 Previous studies postulated different non-spliceosomal removal mechanisms for such introns  
433 including the IRE1 / tRNA ligase system [60, 61] and short direct repeats leading to  
434 transcriptional slippage [62, 63]. It should be mentioned that many sequence variants of  
435 snRNAs are encoded in plant genomes [64]. The presence of multiple spliceosome types in  
436 addition to the canonical U2 and the non-canonical U12 spliceosome could be another  
437 explanation [38].

438 Another hypothesis suggests parasitic splice sites using neighbouring recognition sites for  
439 the splicing machinery to enable their processing [33]. The mere presence of GT close to the  
440 5' non-canonical splice site and AG close to the 3' non-canonical splice site might be  
441 sufficient for this process to take place. These non-canonical splice sites are expected to be  
442 in frame with the associated GT-AG signals which could be responsible for recruiting the  
443 splicing machinery [33]. This hypothesis is supported by the observation that splice sites

444 seem to be missed sometimes thus leading to the use of the next splice site which is usually  
445 in frame with the original one [54]. Further investigation might connect neighbouring  
446 sequences to the processing of minor non-canonical splice sites.

447 There is no evidence for RNA editing to modify splice sites yet, but previous studies found  
448 that modifications of mRNAs are necessary to enable proper splicing in some cases [65].  
449 Even so such a system is probably not in place for all minor non-canonical splice sites, a  
450 modification of nucleotides in the transcript would be another way to regulate gene  
451 expression at the post-transcriptional level.

452 Although, these hypotheses could be an additional or alternative explanations for the  
453 situation observed in *O. sativa*, considering the CA-GG cases as annotation and alignment  
454 errors seems more likely due to their unique presence in this species.

455

#### 456 **Usage of non-canonical splice sites**

457 Our results could provide a strong foundation to further analyses of the splicing process by  
458 providing detailed information about the frequency at which splicing occurred at a certain  
459 splice site. The results indicate that this usage of different splice site types could vary  
460 substantially. A possible explanation for these observed differences is the mixture of RNA-  
461 Seq data sets, which contains samples from various tissues and different environmental or  
462 physiological conditions. Sequencing reads reflect the splicing events occurring under these  
463 specific conditions. As previously indicated by several reports, non-canonical splice sites  
464 might be more frequently used under stress conditions [25, 51, 63]. As most plants are  
465 unable to escape environmental conditions by movement, a higher frequency of non-  
466 canonical splice sites in sessile plant species compared to other taxonomic groups should be  
467 assessed in the future to explore whether there may be a link between non-canonical splice  
468 frequency and life habit.

469 The observation of a stronger usage of the donor splice site over the acceptor splice site in  
470 GT-AG and GC-AG splice site combinations is matching previous reports where one donor  
471 splice site can be associated with multiple acceptor splice sites [54, 66]. The absence of this  
472 effect at minor non-canonical splice site combinations might hint towards a different splicing  
473 mechanism, which is restricted to precisely one combination of donor and acceptor splice  
474 site.

475 The observed usage of GT-TA and AA-TA splice site combinations under stress conditions in  
476 contrast to control conditions as well as the slight increase in the number of supported minor  
477 non-canonical splice site combinations requires further testing e.g. in other species or under  
478 different stress conditions. It would be interesting to validate the usage of different splice  
479 sites in response to stress and not just the expression of stress-related genes. In principle, it  
480 would be possible to assess the usage of splice sites under diverse environmental or  
481 developmental conditions as performed in this study for different plant species. While  
482 numerous RNA-Seq datasets are available per species, these analyses would require a large  
483 number of datasets generated under identical or at least similar conditions. Therefore, the  
484 identification of splicing variants dedicated to certain stress responses is beyond the scope of  
485 this work.

486

#### 487 **Limitations of the current analyses**

488 Some constraints limit the power of the presented analyses. In accordance with the important  
489 plant database Araport11 [37] and previous analyses [30], only the transcript encoding the  
490 longest peptide sequence was considered when investigating splice site conservation across  
491 species. Although the exclusion of alternative transcripts was necessary to compensate  
492 differences in the annotation quality, more non-canonical splice sites could be revealed by  
493 investigations of all transcript versions in the future. The exclusion of annotated introns  
494 shorter than 20 bp as well as the minimal intron length cutoff of 20 bp during the RNA-Seq  
495 read mapping prevented the investigation of very small introns. There are reports of

496 experimentally validated introns with a minimal length of 56bp [67]. Although recent reports  
497 indicate a minimal intron length around 30 bp in humans [68] or even down to 10 bp [51], it is  
498 unclear if very short sequences should be called introns. Since spliceosomal removal of  
499 these very short sequences via lariat formation seems unlikely, a new terminology might be  
500 needed. The applied length cutoff was selected to avoid previously reported issues with false  
501 positives [51]. However, *de novo* identification of very short introns as recently performed for  
502 *Mus musculus* and *H. sapiens* [51, 69] could become feasible as RNA-Seq data sets based  
503 on similar protocols become available for a broad range of plant species. Variations between  
504 RNA-Seq samples posed another challenge. Since there is a substantial amount of variation  
505 within species [70, 71], we can assume that small differences in the genetic background of  
506 the analyzed material could bias the results. Splice sites of interest might be canonical splice  
507 site combinations in some accessions or subspecies, respectively, while they are non-  
508 canonical in others. Despite our attempts to collect RNA-Seq samples derived from a broad  
509 range of different conditions and tissues for each species, data of many specific physiological  
510 states are missing for most species. Therefore, we cannot exclude that certain non-canonical  
511 splice sites were missed in our splice site usage analysis due to a lack of gene expression  
512 under the investigated conditions.

513

#### 514 **Future Perspectives**

515 As costs for RNA-Seq data generation drops over the years [72], improved analyses will  
516 become possible over time. Investigation of homologous non-canonical splice sites poses  
517 several difficulties, as the exonic sequence is not necessarily conserved. Due to upstream  
518 changes in the exon-intron structure [73], the number of the non-canonical introns can differ  
519 between species. However, a computationally feasible approach to investigate the phylogeny  
520 of all non-canonical splice sites would significantly enhance our knowledge e.g. about the  
521 emergence and loss of non-canonical splice sites. Experimental validation of splice sites *in*  
522 *vivo* and *in vitro* could be the next step. It is crucial for such analyses to avoid biases

523 introduced by reverse transcription artifacts e.g. by comparing different enzymes and  
524 avoiding random hexamers during cDNA synthesis [74]. Splice sites could be  
525 experimentally validated e.g. by integration in the *Aequoria vicotria* GFP sequence [75] to  
526 see if they are functional in plants. Our analyses support the concept that differences  
527 between plant species need to be taken into account when performing such investigations  
528 [76, 77].

529

## 530 **Declarations**

### 531 **Ethics approval and consent to participate**

532 Not applicable

### 533 **Consent for publication**

534 Not applicable

### 535 **Availability of data and materials**

536 The datasets generated during the current study are included as Additional files and publicly  
537 available from <https://doi.org/10.4119/unibi/2931315>. Scripts written for the described  
538 analyses are available on github: <https://github.com/bpucker/ncss2018>.

### 539 **Competing interests**

540 The authors declare that they have no competing interests.

### 541 **Funding**

542 We acknowledge support for the Article Processing Charge by the Deutsche  
543 Forschungsgemeinschaft and the Open Access Publication Fund of Bielefeld University.

### 544 **Authors' contribution**

545 BP and SFB designed the research. BP performed bioinformatic analyses. BP and SFB  
546 interpreted the results and wrote the manuscript.

## 547 **Acknowledgements**

548 We are thankful to everyone involved in generating the datasets underlying this study.

549

## 550 **References**

- 551 1. Berget SM, Moore C, Sharp PA. Spliced segments at the 5' terminus of adenovirus 2 late mRNA.  
552 Proc Natl Acad Sci U S A. 1977;74:3171–5.
- 553 2. Gilbert W. The Exon Theory of Genes. Cold Spring Harb Symp Quant Biol. 1987;52:901–5.
- 554 3. Koonin EV, Senkevich TG, Dolja VV. The ancient Virus World and evolution of cells. Biol Direct.  
555 2006;1:29.
- 556 4. Carmel L, Chorev M. The Function of Introns. Front Genet. 2012;3.  
557 doi:<https://doi.org/10.3389/fgene.2012.00055>.
- 558 5. Jo B-S, Choi SS. Introns: The Functional Benefits of Introns in Genomes. Genomics Inform.  
559 2015;13:112–8.
- 560 6. Mukherjee D, Saha D, Acharya D, Mukherjee A, Chakraborty S, Ghosh TC. The role of introns in the  
561 conservation of the metabolic genes of *Arabidopsis thaliana*. Genomics. 2018;110:310–7.
- 562 7. Rogozin IB, Carmel L, Csuros M, Koonin EV. Origin and evolution of spliceosomal introns. Biol  
563 Direct. 2012;7:11.
- 564 8. Csuros M, Rogozin IB, Koonin EV. A Detailed History of Intron-rich Eukaryotic Ancestors Inferred  
565 from a Global Survey of 100 Complete Genomes. PLoS Comput Biol. 2011;7.  
566 doi:10.1371/journal.pcbi.1002150.
- 567 9. Worden AZ, Lee J-H, Mock T, Rouzé P, Simmons MP, Aerts AL, et al. Green evolution and dynamic  
568 adaptations revealed by genomes of the marine picoeukaryotes *Micromonas*. Science.  
569 2009;324:268–72.
- 570 10. Huff JT, Zilberman D, Roy SW. Mechanism for DNA transposons to generate introns on genomic  
571 scales. Nature. 2016;538:533–6.
- 572 11. Zimmerly S, Semper C. Evolution of group II introns. Mob DNA. 2015;6. doi:10.1186/s13100-015-  
573 0037-5.
- 574 12. Knoop V, Brennicke A. Promiscuous mitochondrial group II intron sequences in plant nuclear  
575 genomes. J Mol Evol. 1994;39:144–50.

- 576 13. Pucker B, Holtgraewe D, Stadermann KB, Frey K, Huettel B, Reinhardt R, et al. A Chromosome-  
577 level Sequence Assembly Reveals the Structure of the *Arabidopsis thaliana* Nd-1 Genome and its  
578 Gene Set. bioRxiv 407627. doi:<https://doi.org/10.1101/407627>.
- 579 14. Wahl MC, Will CL, Lührmann R. The Spliceosome: Design Principles of a Dynamic RNP Machine.  
580 Cell. 2009;136:701–18.
- 581 15. Papasaïkas P, Valcárcel J. The Spliceosome: The Ultimate RNA Chaperone and Sculptor. Trends  
582 Biochem Sci. 2016;41:33–45.
- 583 16. Turunen JJ, Niemelä EH, Verma B, Frilander MJ. The significant other: splicing by the minor  
584 spliceosome. Wiley Interdiscip Rev RNA. 2013;4:61–76.
- 585 17. Hall SL, Padgett RA. Conserved Sequences in a Class of Rare Eukaryotic Nuclear Introns with Non-  
586 consensus Splice Sites. J Mol Biol. 1994;239:357–65.
- 587 18. Wu Q, Krainer AR. Splicing of a divergent subclass of AT-AC introns requires the major  
588 spliceosomal snRNAs. RNA N Y N. 1997;3:586–601.
- 589 19. Dietrich RC, Inorvaia R, Padgett RA. Terminal intron dinucleotide sequences do not distinguish  
590 between U2- and U12-dependent introns. Mol Cell. 1997;1:151–60.
- 591 20. Lewandowska D, Simpson CG, Clark GP, Jennings NS, Barciszewska-Pacak M, Lin C-F, et al.  
592 Determinants of Plant U12-Dependent Intron Splicing Efficiency. Plant Cell. 2004;16:1340–52.
- 593 21. Wang G-S, Cooper TA. Splicing in disease: disruption of the splicing code and the decoding  
594 machinery. Nat Rev Genet. 2007;8:749–61.
- 595 22. Will CL, Lührmann R. Spliceosome Structure and Function. Cold Spring Harb Perspect Biol.  
596 2011;3:a003707.
- 597 23. Rogozin IB, Wolf YI, Sorokin AV, Mirkin BG, Koonin EV. Remarkable Interkingdom Conservation of  
598 Intron Positions and Massive, Lineage-Specific Intron Loss and Gain in Eukaryotic Evolution. Curr Biol.  
599 2003;13:1512–7.
- 600 24. Jacob M, Gallinaro H. The 5' splice site: phylogenetic evolution and variable geometry of  
601 association with U1RNA. Nucleic Acids Res. 1989;17:2159–80.
- 602 25. Sibley CR, Blazquez L, Ule J. Lessons from non-canonical splicing. Nat Rev Genet. 2016;17:407–21.
- 603 26. Gorlova O, Fedorov A, Logothetis C, Amos C, Gorlov I. Genes with a large intronic burden show  
604 greater evolutionary conservation on the protein level. BMC Evol Biol. 2014;14:50.
- 605 27. Sibley CR, Emmett W, Blazquez L, Faro A, Haberman N, Briese M, et al. Recursive splicing in long  
606 vertebrate genes. Nature. 2015;521:371–5.
- 607 28. Zhao W, Cheng Y, Zhang C, You Q, Shen X, Guo W, et al. Genome-wide identification and  
608 characterization of circular RNAs by high throughput sequencing in soybean. Sci Rep. 2017;7:5636.
- 609 29. Jackson JJ. A reappraisal of non-consensus mRNA splice sites. Nucleic Acids Res. 1991;19:3795–8.
- 610 30. Pucker B, Holtgräwe D, Weisshaar B. Consideration of non-canonical splice sites improves gene  
611 prediction on the *Arabidopsis thaliana* Niederzenz-1 genome sequence. BMC Res Notes. 2017;10.  
612 doi:<https://doi.org/10.1186/s13104-017-2985-y>.

- 613 31. Dobin A, Davis CA, Schlesinger F, Drenkow J, Zaleski C, Jha S, et al. STAR: ultrafast universal RNA-  
614 seq aligner. *Bioinformatics*. 2013;29:15–21.
- 615 32. Dobin A, Gingeras TR. Mapping RNA-seq Reads with STAR. *Curr Protoc Bioinforma*.  
616 2015;51:11.14.1-11.14.19.
- 617 33. Burset M, Seledtsov IA, Solovyev VV. Analysis of canonical and non-canonical splice sites in  
618 mammalian genomes. *Nucleic Acids Res*. 2000;28:4364–75.
- 619 34. Sheth N, Roca X, Hastings ML, Roeder T, Krainer AR, Sachidanandam R. Comprehensive splice-site  
620 analysis using comparative genomics. *Nucleic Acids Res*. 2006;34:3955–67.
- 621 35. Souvorov A, Kapustin Y, Kiryutin B, Chetvernin V, Tatusova T, Lipman D. Gnomon – NCBI  
622 eukaryotic gene prediction tool. 2010.  
623 <http://www.ncbi.nlm.nih.gov/core/assets/genome/files/Gnomon-description.pdf>. Accessed 25 Sep  
624 2018.
- 625 36. Simão FA, Waterhouse RM, Ioannidis P, Kriventseva EV, Zdobnov EM. BUSCO: assessing genome  
626 assembly and annotation completeness with single-copy orthologs. *Bioinforma Oxf Engl*.  
627 2015;31:3210–2.
- 628 37. Cheng C-Y, Krishnakumar V, Chan AP, Thibaud-Nissen F, Schobel S, Town CD. Araport11: a  
629 complete reannotation of the *Arabidopsis thaliana* reference genome. *Plant J*. 2017;89:789–804.
- 630 38. Qu W, Cingolani P, Zeeberg BR, Ruden DM. A Bioinformatics-Based Alternative mRNA Splicing  
631 Code that May Explain Some Disease Mutations Is Conserved in Animals. *Front Genet*. 2017;8.  
632 doi:10.3389/fgene.2017.00038.
- 633 39. Hoff KJ, Stanke M. WebAUGUSTUS—a web service for training AUGUSTUS and predicting genes in  
634 eukaryotes. *Nucleic Acids Res*. 2013;41:W123–8.
- 635 40. Altschul SF, Gish W, Miller W, Myers EW, Lipman DJ. Basic local alignment search tool. *J Mol Biol*.  
636 1990;215:403–10.
- 637 41. Hunter JD. Matplotlib: A 2D Graphics Environment. *Comput Sci Eng*. 2007;9:90–5.
- 638 42. Leinonen R, Sugawara H, Shumway M, International Nucleotide Sequence Database  
639 Collaboration. The sequence read archive. *Nucleic Acids Res*. 2011;39 Database issue:D19-21.
- 640 43. Haak M, Vinke S, Keller W, Droste J, Rückert C, Kalinowski J, et al. High Quality de Novo  
641 Transcriptome Assembly of *Croton tiglium*. *Front Mol Biosci*. 2018;5.  
642 doi:<https://doi.org/10.3389/fmolb.2018.00062>.
- 643 44. Quinlan AR, Hall IM. BEDTools: a flexible suite of utilities for comparing genomic features.  
644 *Bioinformatics*. 2010;26:841–2.
- 645 45. Katoh K, Standley DM. MAFFT Multiple Sequence Alignment Software Version 7: Improvements in  
646 Performance and Usability. *Mol Biol Evol*. 2013;30:772–80.
- 647 46. Price MN, Dehal PS, Arkin AP. FastTree 2 – Approximately Maximum-Likelihood Trees for Large  
648 Alignments. *PLoS ONE*. 2010;5. doi:10.1371/journal.pone.0009490.



- 649 47. Hahn A, Kilian J, Mohrholz A, Ladwig F, Peschke F, Dautel R, et al. Plant Core Environmental Stress  
650 Response Genes Are Systemically Coordinated during Abiotic Stresses. *Int J Mol Sci.* 2013;14:7617–  
651 41.
- 652 48. Pucker B, Holtgräwe D, Sörensen TR, Stracke R, Viehöver P, Weisshaar B. A De Novo Genome  
653 Sequence Assembly of the *Arabidopsis thaliana* Accession Niederzenz-1 Displays Presence/Absence  
654 Variation and Strong Synteny. *PLOS ONE.* 2016;11:e0164321.
- 655 49. Pucker B. RNA-Seq read coverage depth of splice sites in plants. 2018.  
656 <https://doi.org/10.4119/unibi/2931315>. Accessed 11 Oct 2018.
- 657 50. Stracke R, Holtgräwe D, Schneider J, Pucker B, Sörensen TR, Weisshaar B. Genome-wide  
658 identification and characterisation of R2R3-MYB genes in sugar beet (*Beta vulgaris*). *BMC Plant Biol.*  
659 2014;14:249.
- 660 51. Abebrese EL, Ali SH, Arnold ZR, Andrews VM, Armstrong K, Burns L, et al. Identification of human  
661 short introns. *PLOS ONE.* 2017;12:e0175393.
- 662 52. Sparks ME, Brendel V. Incorporation of splice site probability models for non-canonical introns  
663 improves gene structure prediction in plants. *Bioinforma Oxf Engl.* 2005;21 Suppl 3:iii20-30.
- 664 53. Gupta S, Wang B-B, Stryker GA, Zanetti ME, Lal SK. Two novel arginine/serine (SR) proteins in  
665 maize are differentially spliced and utilize non-canonical splice sites. *Biochim Biophys Acta.*  
666 2005;1728:105–14.
- 667 54. Alexandrov NN, Troukhan ME, Brover VV, Tatarinova T, Flavell RB, Feldmann KA. Features of  
668 *Arabidopsis* Genes and Genome Discovered using Full-length cDNAs. *Plant Mol Biol.* 2006;60:69–85.
- 669 55. Ner-Gaon H, Leviatan N, Rubin E, Fluhr R. Comparative Cross-Species Alternative Splicing in  
670 Plants. *Plant Physiol.* 2007;144:1632–41.
- 671 56. Richardson DN, Rogers MF, Labadorf A, Ben-Hur A, Guo H, Paterson AH, et al. Comparative  
672 Analysis of Serine/Arginine-Rich Proteins across 27 Eukaryotes: Insights into Sub-Family Classification  
673 and Extent of Alternative Splicing. *PLOS ONE.* 2011;6:e24542.
- 674 57. Ling Y, Alshareef S, Butt H, Lozano-Juste J, Li L, Galal AA, et al. Pre-mRNA splicing repression  
675 triggers abiotic stress signaling in plants. *Plant J.* 2017;89:291–309.
- 676 58. Slater GS, Birney E. Automated generation of heuristics for biological sequence comparison. *BMC*  
677 *Bioinformatics.* 2005;6:31–31.
- 678 59. Parada GE, Munita R, Cerda CA, Gysling K. A comprehensive survey of non-canonical splice sites in  
679 the human transcriptome. *Nucleic Acids Res.* 2014;42:10564–78.
- 680 60. Sidrauski C, Cox JS, Walter P. tRNA Ligase Is Required for Regulated mRNA Splicing in the  
681 Unfolded Protein Response. *Cell.* 1996;87:405–13.
- 682 61. Gonzalez TN, Sidrauski C, Dörfler S, Walter P. Mechanism of non-spliceosomal mRNA splicing in  
683 the unfolded protein response pathway. *EMBO J.* 1999;18:3119–32.
- 684 62. Ritz K, van Schaik BDC, Jakobs ME, Aronica E, Tijssen MA, van Kampen AHC, et al. Looking ultra  
685 deep: Short identical sequences and transcriptional slippage. *Genomics.* 2011;98:90–5.

- 686 63. Dubrovina AS, Kiselev KV, Zhuravlev YN. The Role of Canonical and Noncanonical Pre-mRNA  
687 Splicing in Plant Stress Responses. *BioMed Res Int.* 2013;2013. doi:10.1155/2013/264314.
- 688 64. Solymosy F, Pollák T. Uridylate-Rich Small Nuclear RNAs (UsnRNAs), Their Genes and  
689 Pseudogenes, and UsnRNPs in Plants: Structure and Function. A Comparative Approach. *Crit Rev*  
690 *Plant Sci.* 1993;12:275–369.
- 691 65. Castandet B, Choury D, Bégu D, Jordana X, Araya A. Intron RNA editing is essential for splicing in  
692 plant mitochondria. *Nucleic Acids Res.* 2010;38:7112–21.
- 693 66. Mühlemann O, Kreivi JP, Akusjärvi G. Enhanced splicing of nonconsensus 3' splice sites late during  
694 adenovirus infection. *J Virol.* 1995;69:7324–7.
- 695 67. Sasaki-Haraguchi N, Shimada MK, Taniguchi I, Ohno M, Mayeda A. Mechanistic insights into  
696 human pre-mRNA splicing of human ultra-short introns: Potential unusual mechanism identifies G-  
697 rich introns. *Biochem Biophys Res Commun.* 2012;423:289–94.
- 698 68. Piovesan A, Caracausi M, Ricci M, Strippoli P, Vitale L, Pelleri MC. Identification of minimal  
699 eukaryotic introns through GeneBase, a user-friendly tool for parsing the NCBI Gene databank. *DNA*  
700 *Res Int J Rapid Publ Rep Genes Genomes.* 2015;22:495–503.
- 701 69. Bai Y, Ji S, Wang Y. IRcall and IRclassifier: two methods for flexible detection of intron retention  
702 events from RNA-Seq data. *BMC Genomics.* 2015;16:S9.
- 703 70. Clark RM, Schweikert G, Toomajian C, Ossowski S, Zeller G, Shinn P, et al. Common Sequence  
704 Polymorphisms Shaping Genetic Diversity in *Arabidopsis thaliana*. *Science.* 2007;317:338–42.
- 705 71. Alonso-Blanco C, Andrade J, Becker C, Bemm F, Bergelson J, Borgwardt KM, et al. 1,135 Genomes  
706 Reveal the Global Pattern of Polymorphism in *Arabidopsis thaliana*. *Cell.* 2016;166:481–91.
- 707 72. Muir P, Li S, Lou S, Wang D, Spakowicz DJ, Salichos L, et al. The real cost of sequencing: scaling  
708 computation to keep pace with data generation. *Genome Biol.* 2016;17:53.
- 709 73. Garcia-España A, Mares R, Sun T-T, DeSalle R. Intron Evolution: Testing Hypotheses of Intron  
710 Evolution Using the Phylogenomics of Tetraspanins. *PLoS ONE.* 2009;4.  
711 doi:10.1371/journal.pone.0004680.
- 712 74. Houseley J, Tollervey D. Apparent Non-Canonical Trans-Splicing Is Generated by Reverse  
713 Transcriptase In Vitro. *PLoS ONE.* 2010;5. doi:10.1371/journal.pone.0012271.
- 714 75. Haseloff J, Siemering KR, Prasher DC, Hodge S. Removal of a cryptic intron and subcellular  
715 localization of green fluorescent protein are required to mark transgenic *Arabidopsis* plants brightly.  
716 *Proc Natl Acad Sci U S A.* 1997;94:2122–7.
- 717 76. Keith B, Chua N-H. Monocot and dicot pre-mRNAs are processed with different efficiencies in  
718 transgenic tobacco. *EMBO J.* 1986;5:2419–25.
- 719 77. Goodall GJ, Filipowicz W. Different effects of intron nucleotide composition and secondary  
720 structure on pre-mRNA splicing in monocot and dicot plants. *EMBO J.* 1991;10:2635–44.
- 721
- 722

723 **Additional files**

724 **Additional file 1. Analysed data sets.** List of investigated genome sequences and

725 corresponding annotation. Md5sums are given for all files.

726 **Additional file 2. RNA-Seq data sets.** List of Sequence Read Archive accession numbers

727 of all included RNA-Seq data sets sorted by species.

728 **Additional file 3. RNA-Seq based splice site validation.** Schematic illustration how the

729 splitted mapping of RNA-Seq reads (arrows) over exons (red) and introns (grey) was used to

730 validate splice sites. The read coverage depth should drop when moving from an exon into

731 an intron. Red arrows indicate the four positions considered for this analysis.

732 **Additional file 4. Phylogenetic tree.** RbcL sequences were used to construct a

733 phylogenetic tree of all species involved in the analysis. Missing data points were corrected

734 by relying on the NCBI taxonomy thus the branch lengths are not to scale.

735 **Additional file 5. Genome statistics.** Statistical information about each analyzed genome

736 sequence and the average values across all species are listed.

737 **Additional file 6. Number of splice sites per species.** Canonical and non-canonical splice

738 sites were counted per species as described in the method section.

739 **Additional file 7. Splice site diversity per species.** The occurrence of all possible splice

740 site combinations was counted for all species as described in the method section.

741 **Additional file 8. Similarity of the non-canonical splice site pattern across plants.** The

742 Spearman correlation coefficient between each pair of plants was calculated based on the

743 observed frequency of all possible splice site combinations. Red color indicates similarity

744 while blue color indicates substantial differences. As this correlation calculation takes the

745 individual counts for all splice sites combinations in all species into account, it is possible to

746 calculate correlation values even in the absence of non-canonical splice sites.

747 **Additional file 9. Correlation of splice site frequencies with genome size.** For each  
748 investigated species the number of canonical and non-canonical splice sites is displayed.  
749 The Spearman correlation coefficient between splice site number and genome size is  $r=0.14$   
750 for canonical splice sites and  $r=0.02$  for non-canonical splice sites.

751 **Additional file 10. Genome-wide distribution of non-canonical splice sites in *A. thaliana*.**  
752 *thaliana*. The distribution of genes with non-canonical splice sites (red dots) across the five  
753 chromosome sequences (black lines) of *A. thaliana* was analysed.

754 **Additional file 11. Genome-wide distribution of non-canonical splice sites in *B. vulgaris*.**  
755 *vulgaris*. The distribution of genes with non-canonical splice sites (red dots) across the nine  
756 chromosome sequences (black lines) of *B. vulgaris* was analysed.

757 **Additional file 12. Genome-wide distribution of non-canonical splice sites in *V. vinifera*.**  
758 The distribution of genes with non-canonical splice sites (red dots) across the nineteen  
759 chromosome sequences (black lines) of *V. vinifera* was analysed.

760 **Additional file 13. Conserved sequences around splice sites in *Oryza sativa*.** Predicted  
761 splice site combinations observed in *Oryza sativa* are indicated by a black line below them.  
762 Donor splice sites are on the left, acceptor splice sites on the right. The minor non-canonical  
763 splice combination CA-GG at the top could be converted into the major non-canonical GC-  
764 AG combination by just shifting one nucleotide to the left. The presence of two Gs at the  
765 acceptor splice site seems to correlate with the prediction of this CA-GG splice site  
766 combination instead of a major non-canonical GC-AG.

767 **Additional file 14. Non-canonical splice sites in single copy genes.** The occurrence of  
768 non-canonical splice sites in single copy genes (BUSCO) and in all genes was assessed per  
769 species.

770 **Additional file 15. Proportion of non-canonical splice sites.** The green line indicates the  
771 average (median) proportion of genes with a non-canonical splice site combination. Grey  
772 lines indicate the range between 25% and 75% quantiles. Genes with more introns are more

773 likely to have a non-canonical splice site combination. There is an almost perfect correlation  
774 up to 40 introns per gene. Insufficient sample sizes above this intron number prevent further  
775 analyses.

776 **Additional file 16. Conservation of non-canonical splice sites.** Non-canonical splice sites  
777 at conserved positions in putative homologous of At1g79350 across various species.

778 **Additional file 17. Supported splice sites.** Percentage of splice sites supported by RNA-  
779 Seq reads is given per species.

780 **Additional file 18. RNA-Seq data set sizes.** There is a moderate correlation between the  
781 amount of bases in the used RNA-Seq data sets and the number of supported splice sites.  
782 The trend is similar for canonical ( $r=0.46$ ) and non-canonical ( $r=0.43$ ) splice site  
783 combinations.

784

785

786 **Fig. 1: Correlation between splice site sequence divergence and frequency.** Spearman  
787 correlation coefficient between the splice site combination divergence from the canonical GT-  
788 AG and their frequency is  $r=-0.4297$  ( $p\text{-value} = 7 \times 10^{-13}$ ).

789 **Fig. 2: Splice site combination frequency.** The frequencies of selected splice site  
790 combinations across 121 plant species are displayed. Splice site combinations with high  
791 similarity to the canonical GT-AG or the major non-canonical GC-AG/AT-AC are more  
792 frequent than other splice site combinations.

793 **Fig. 3: Intron length distribution.** Length distribution of introns with canonical (green) and  
794 non-canonical (red) splice site combinations are displayed. Values of all species are  
795 combined in this plot resulting in a consensus curve. Most striking differences are (1) at the  
796 intron length peak around 200 bp where non-canonical splice site combinations are less

797 likely and (2) at very long intron lengths where introns with non-canonical splice sites are  
798 more likely.

799 **Fig. 4: Splice site frequency.** Occurrences of the canonical GT-AG, the major non-  
800 canonical GC-AG and AT-AC as well as the combined occurrences of all minor non-  
801 canonical splice sites (others) are displayed. The proportion of GT-AG is about 98.7%. There  
802 is some variation, but most species show GC-AG at about 1.2% and AT-AC at 0.06%. All  
803 others combined account usually for about 0.09% as well.

804 **Fig. 5: Usage of splice sites.** Usage of splice sites was calculated based on the number of  
805 RNA-Seq reads supporting the exon next to a splice site and the number of reads supporting  
806 the intron containing the splice site. There is a substantial difference between the usage of 5'  
807 and 3' splice sites in favor of the 5' splice sites. Canonical GT-AG splice site combinations  
808 are used more often than major or minor non-canonical splice site combinations. Sample  
809 size (n) and median (m) of the usage values are given for all splice sites.

810

average number of observed splice sites across species

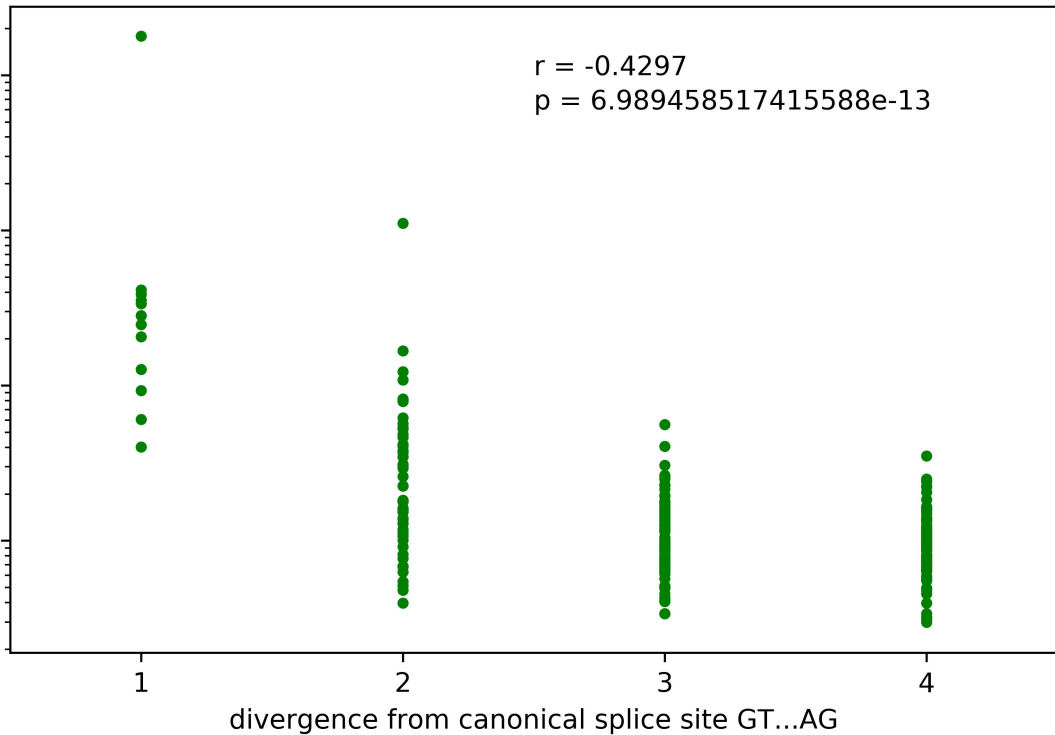

frequency in plant genomes

$10^0$   
 $10^1$   
 $10^2$   
 $10^3$   
 $10^4$   
 $10^5$

AT...AA

AT...AC

AT...AG

AA...AA

GA...AG

GT...AG

GC...AG

GT...AA

GT...GG

GT...AT

others

splice site combinations

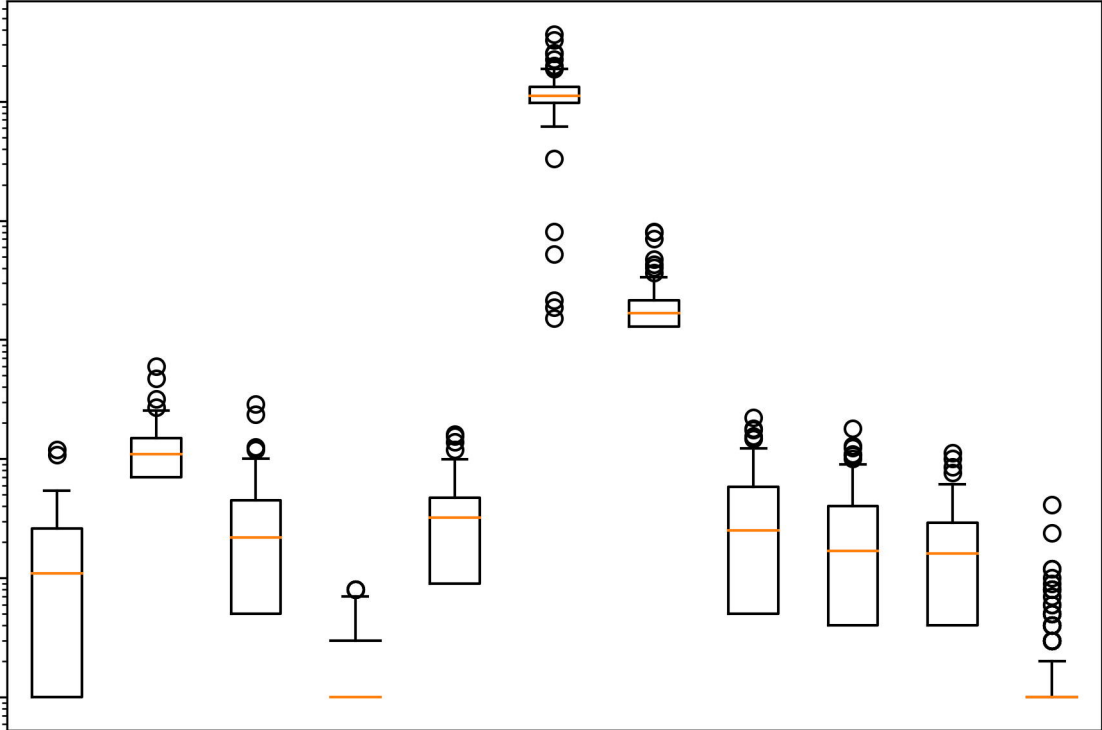



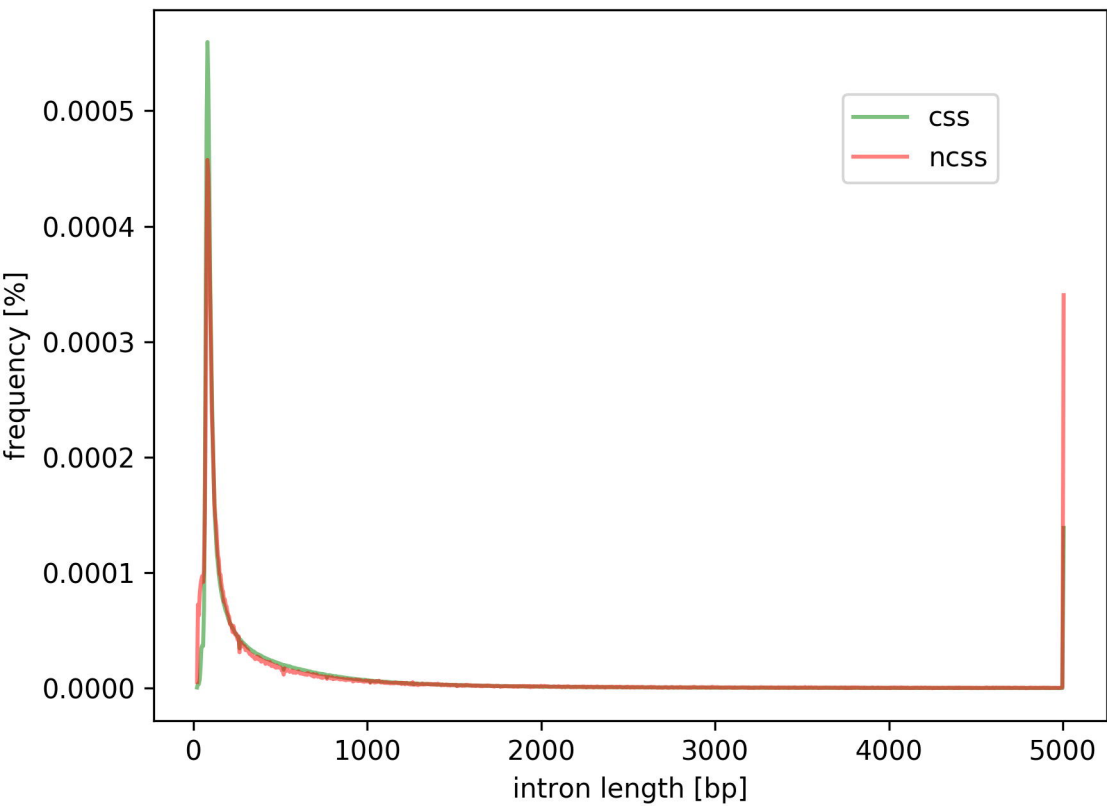

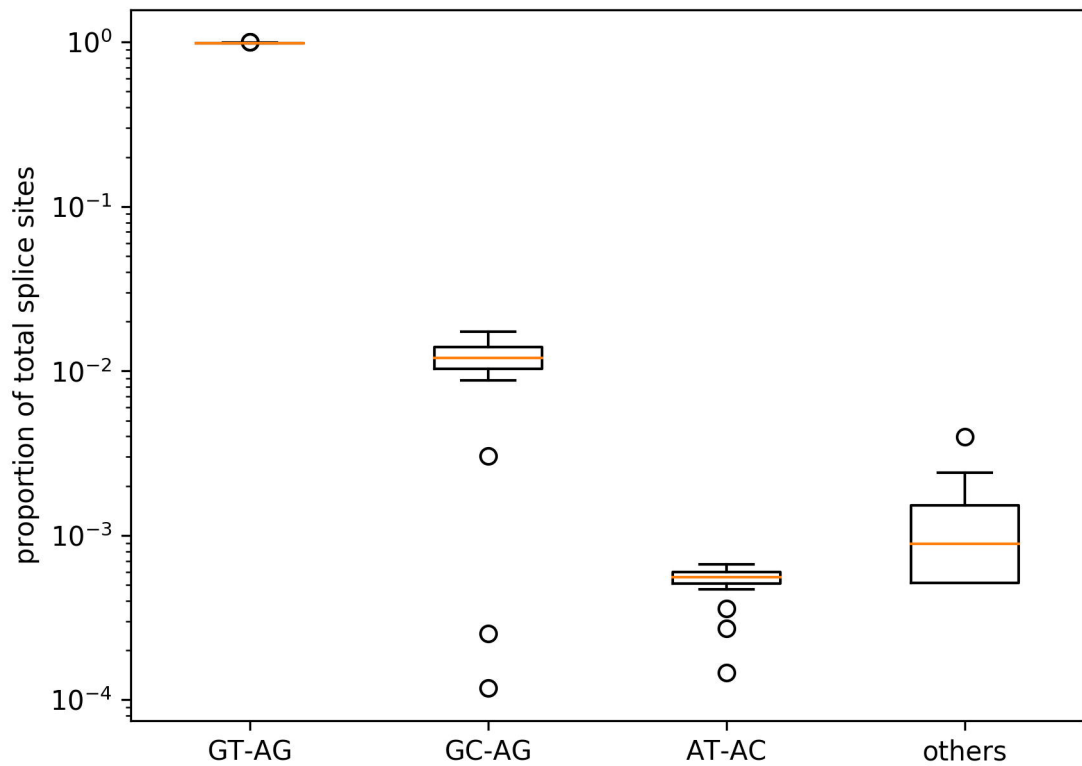

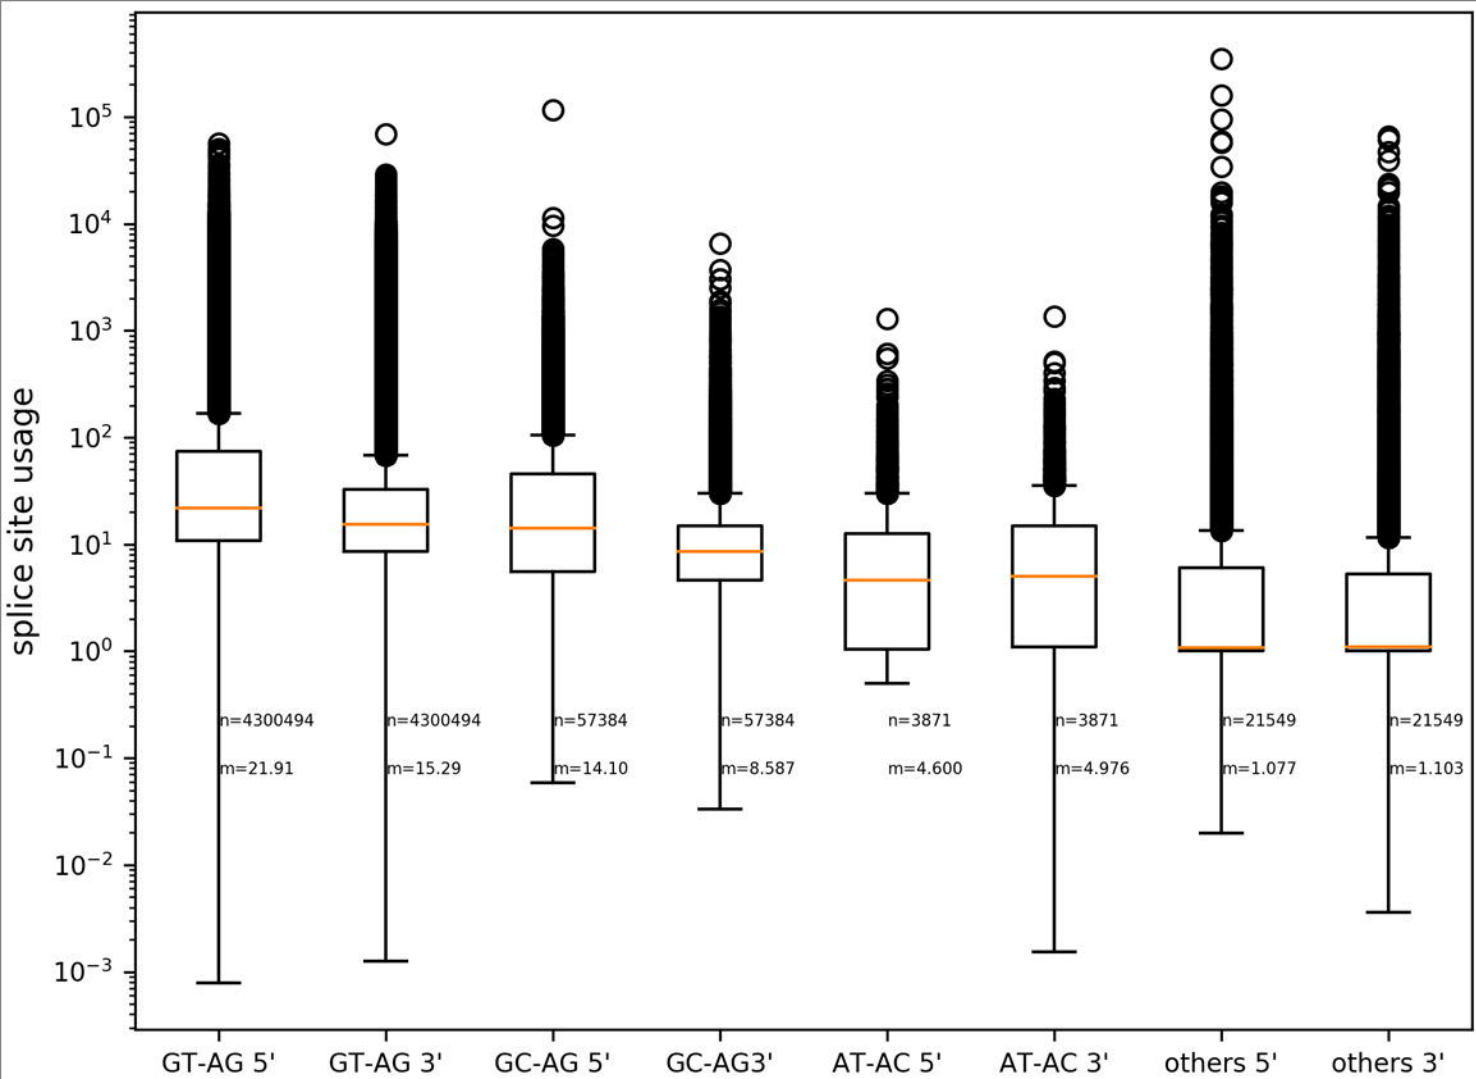

Source: https://www.biorxiv.org/content/10.1101/428318v5.full.pdf
