# Supplementary material for: Genome-wide analyses supported by RNA-Seq reveal non-canonical splice sites in plant genomes
Source: bioRxiv or medRxiv preprint supplement (doi:10.1101/428318), 2018-12-02
Supplement: Supplementary file [file media-4.pdf]

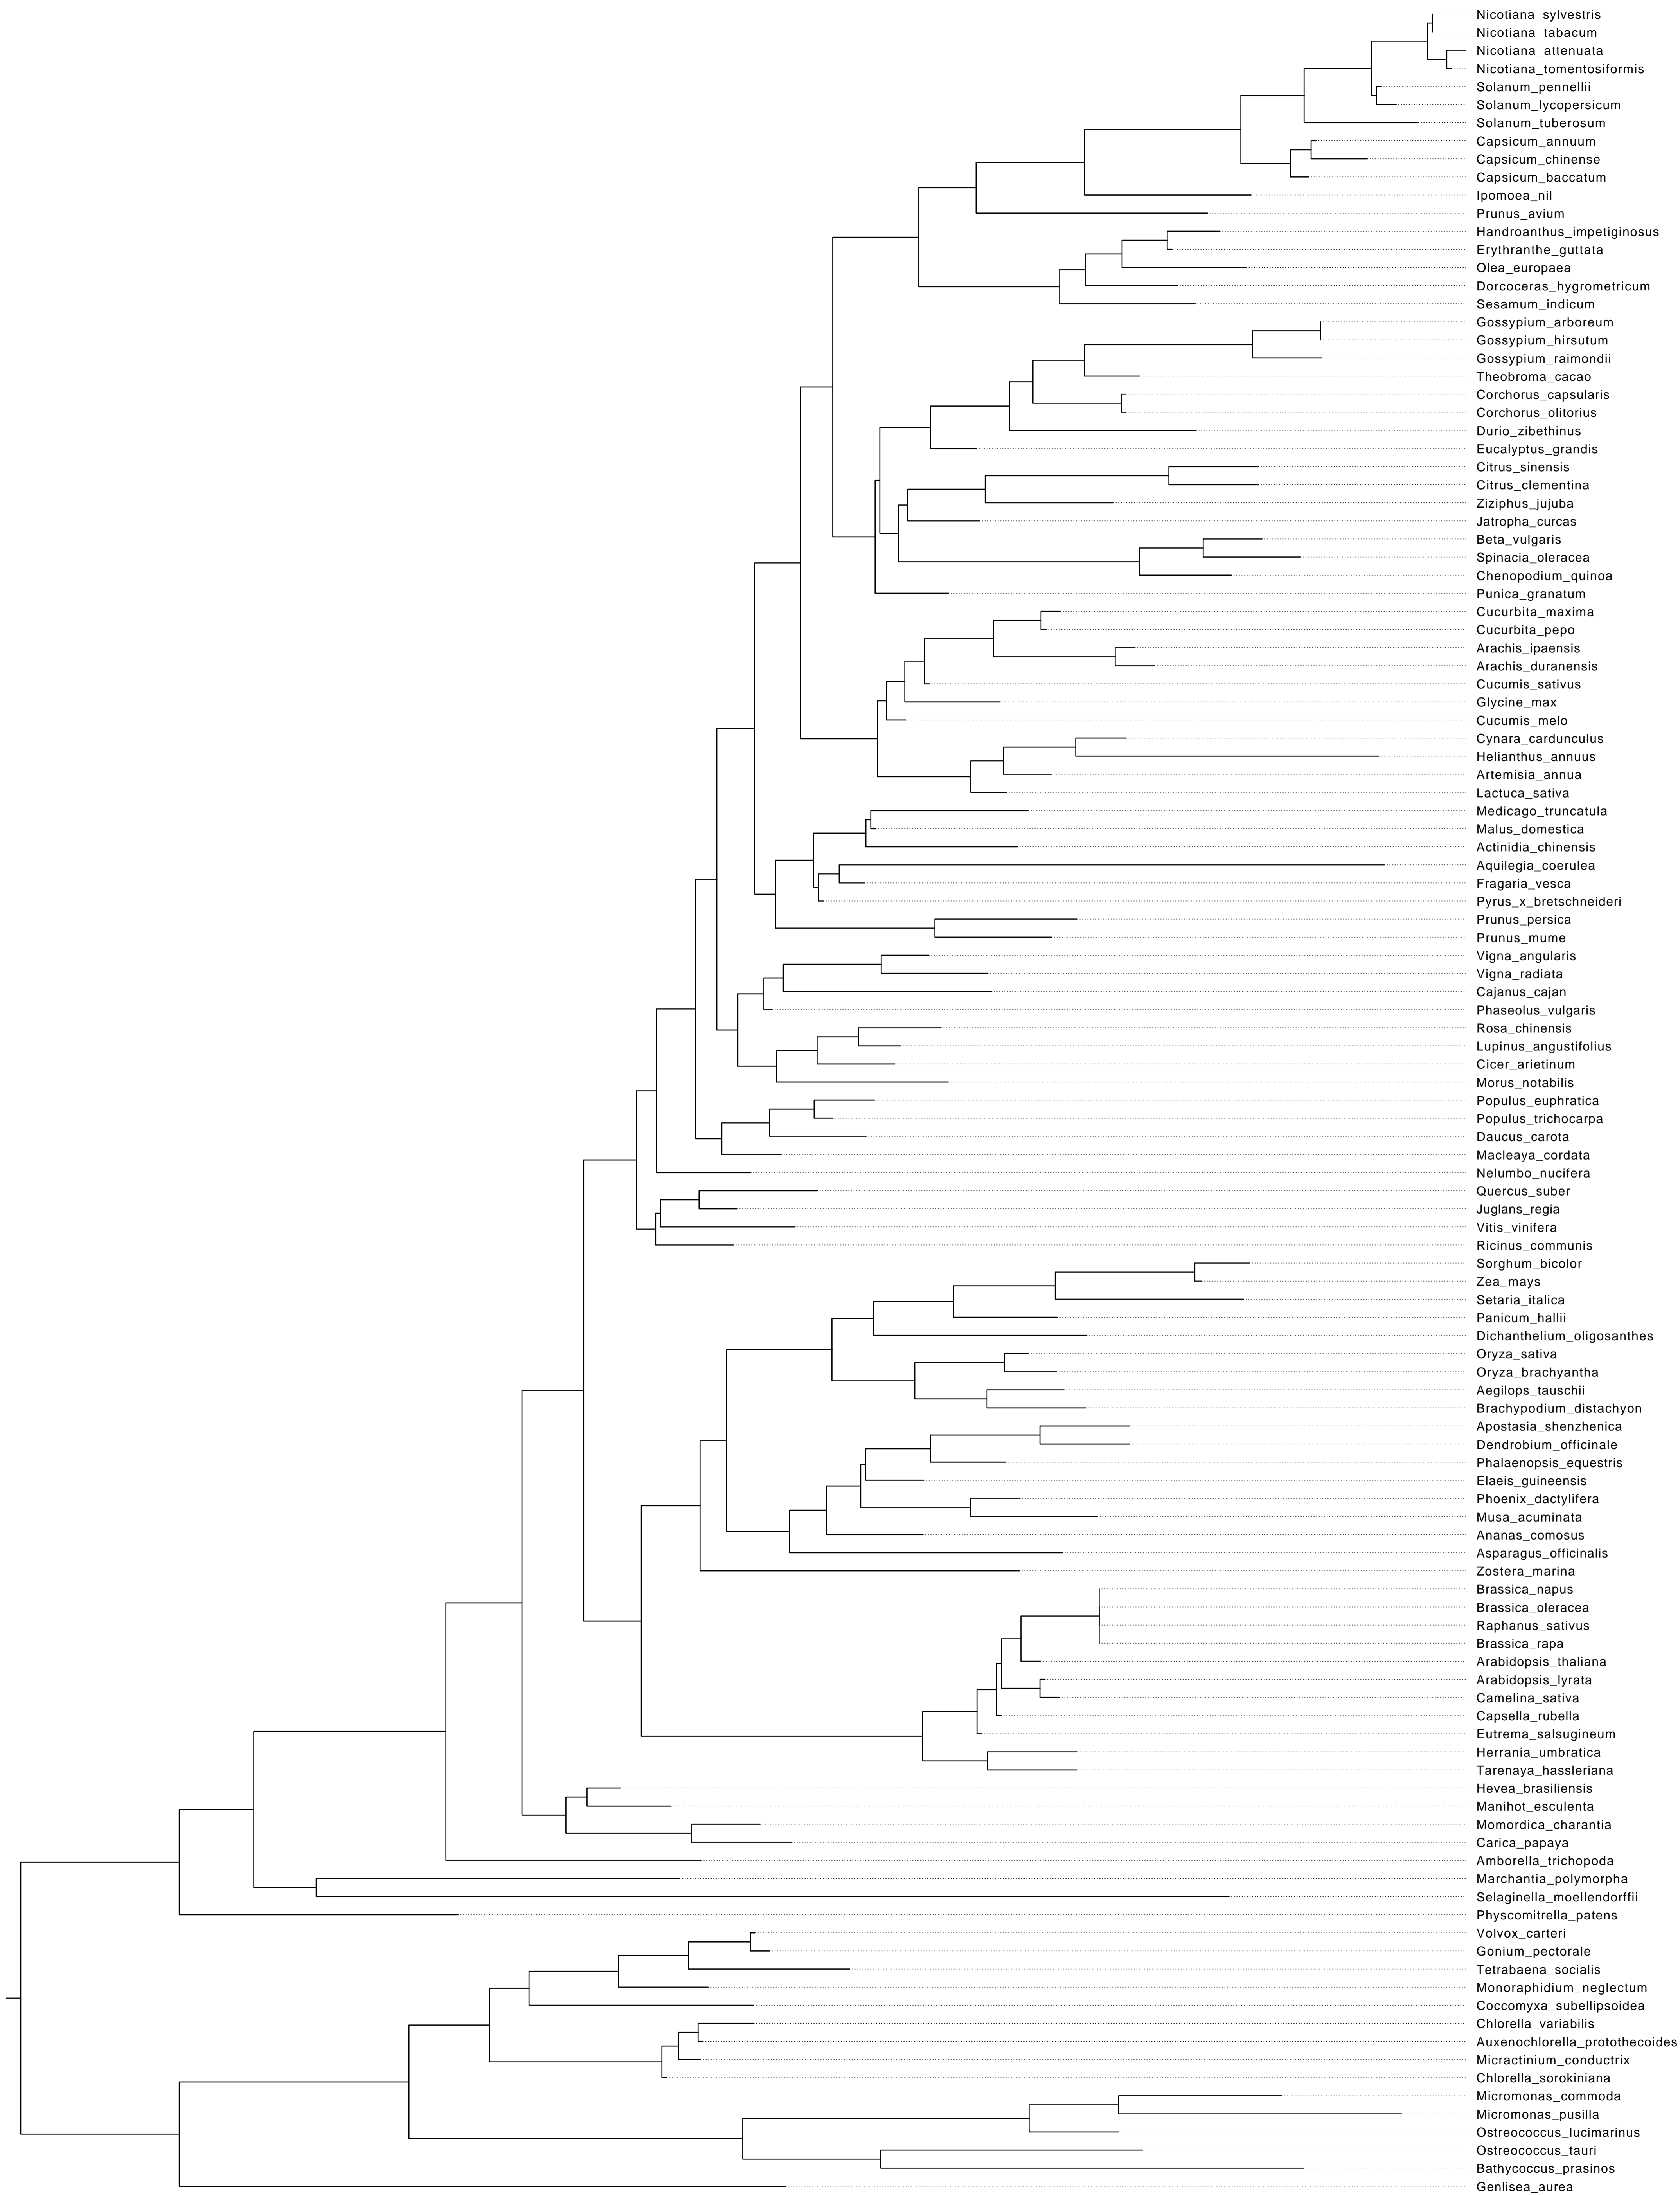

0.03
